# Supplementary material for: Proton supplier role of binuclear gold complexes in promoting hydrofunctionalisation of nonactivated alkenes
Source: Royal Society of Chemistry journal article supplement (doi:10.1039/c8cy02482k), 2019-01-01
Supplement: c8cy02482k1.pdf [file c8cy02482k1.pdf]

## “Supporting Information for”

# Proton Supplier Role of Binuclear Gold Complexes in Promoting Hydrofunctionalization of unactivated Alkenes

Maryam Asgari,<sup>a</sup> Christopher Hyland,<sup>b</sup> A. Stephen K. Hashmi,<sup>c</sup> Brian F. Yates,<sup>d</sup> Alireza Ariafard<sup>\*,a,d</sup>

<sup>a</sup>Department of Chemistry, Central Tehran Branch, Islamic Azad University, Shahrak Gharb, Tehran, Iran

<sup>b</sup>School of Chemistry and Molecular Bioscience, University of Wollongong, Wollongong, New South Wales 2522, Australia

<sup>c</sup>Organisch-Chemisches Institut, Heidelberg University, Im Neuenheimer Feld 270, 69120 Heidelberg, Germany

<sup>d</sup>School of Natural Sciences (Chemistry), University of Tasmania, Private Bag 75, Hobart TAS 7001, Australia

## Contents:

**Fig. S1** Energy profile for HOTf-catalyzed hydroacetoxylation of propene calculated at M06-D3-CPCM/BS2//B3LYP-CPCM/BS1 level of theory (page S3)

**Fig. S2** Energy profile for HOTf-catalyzed hydroacetoxylation of propene calculated at B3LYP-D3-CPCM/BS2//B3LYP-CPCM/BS1 level of theory (page S4)

**Fig. S3** Energy profile for HOTf-catalyzed hydroaryloxylation of propene calculated at B3LYP-D3-CPCM/BS2//B3LYP-CPCM/BS1 level of theory (page S5)

**Fig. S4** Energy profile for HOTf-catalyzed hydroaryloxylation of propene calculated at M06-D3-CPCM/BS2//B3LYP-CPCM/BS1 level of theory (page S6)

**Table S1.** Free energy changes calculated for **TS3** ( $\Delta G_D$  and  $\Delta G_F$ ), **TS7** ( $\Delta G_c$ ), **TS8** ( $\Delta G_E$ ) and **TS6** ( $\Delta G_I$ ) calculated at different levels of theory for pathways C-F and I where L =  $\text{PMe}_3$  and  $\text{PPh}_3$ . Free energies are given in kcal/mol. It follows that regardless of the method and the nature of the phosphine ligands ( $\text{PMe}_3$  or  $\text{PPh}_3$ ) used in the calculations, pathways E and F (binuclear mechanism) are the most favorable (page S7)

**Fig. S5** Optimized structures for **TS4**, **TS8**, **TS8'** along with some structural parameters (page S8)

**Fig. S6** Calculated mechanism for C-O bond formation via transition structure **TS<sub>5,7</sub>** in which  $\text{LAuOAc}$  (**7**) reacts with the alkene complex **5** (page S8)

**Table S2.** Cartesian coordinates and total energies for all of the calculated structures in water (page S9)

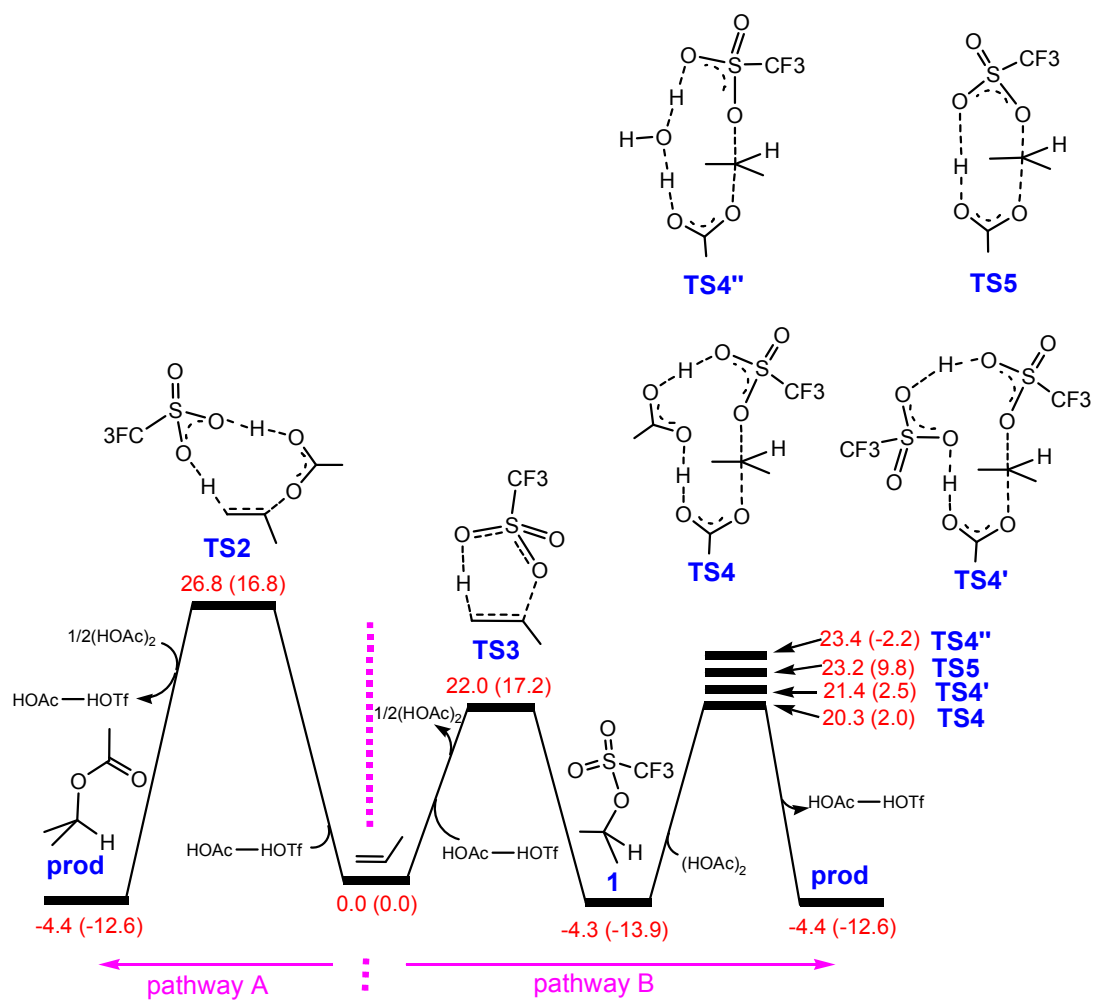

**Fig. S1** Energy profile for HOF-catalyzed hydroacetoxylation of propene calculated at M06-D3-CPCM/BS2//B3LYP-CPCM/BS1 level of theory. Free energies (potential energies) are given in kcal/mol.

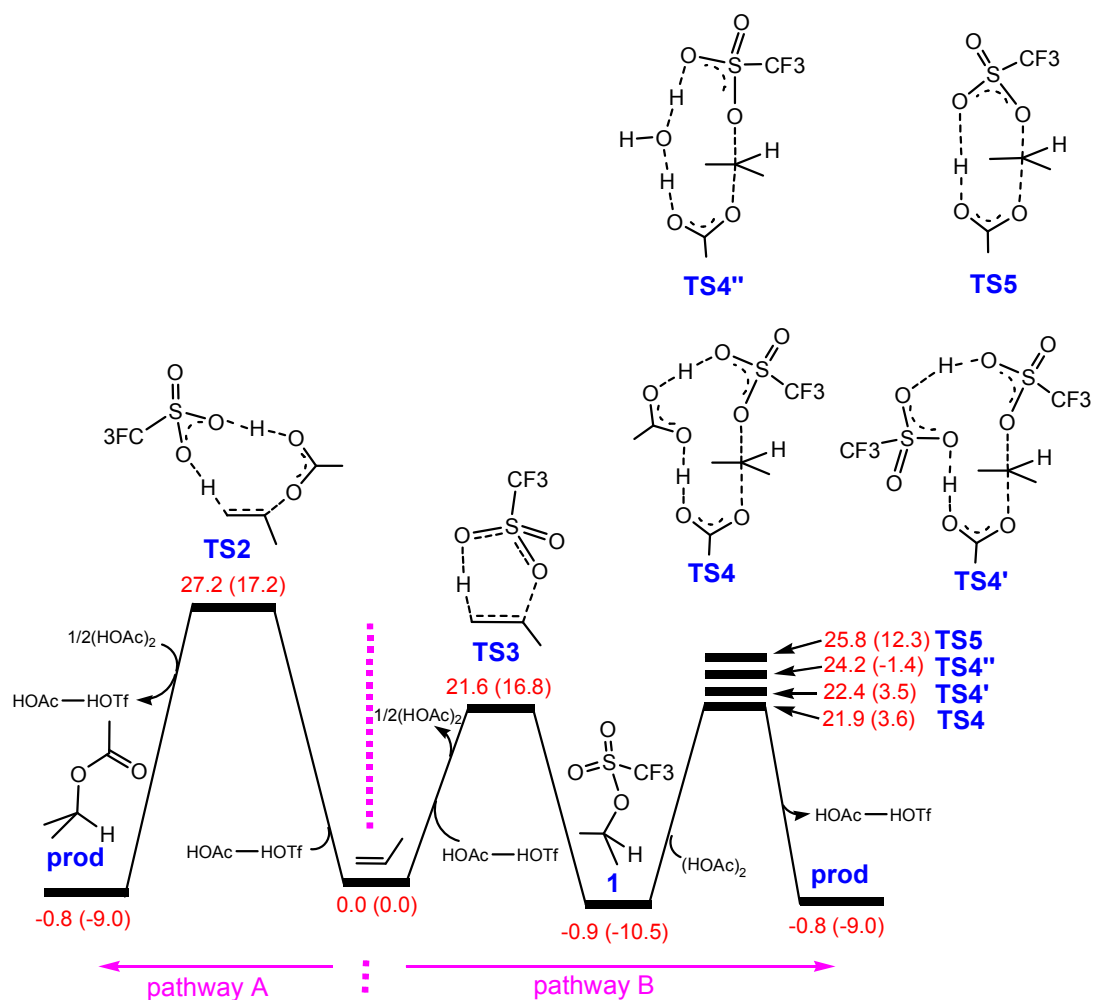

**Fig. S2** Energy profile for HOTf-catalyzed hydroacetoxylation of propene calculated at B3LYP-D3-CPCM/BS2//B3LYP-CPCM/BS1 level of theory. Free energies (potential energies) are given in kcal/mol.

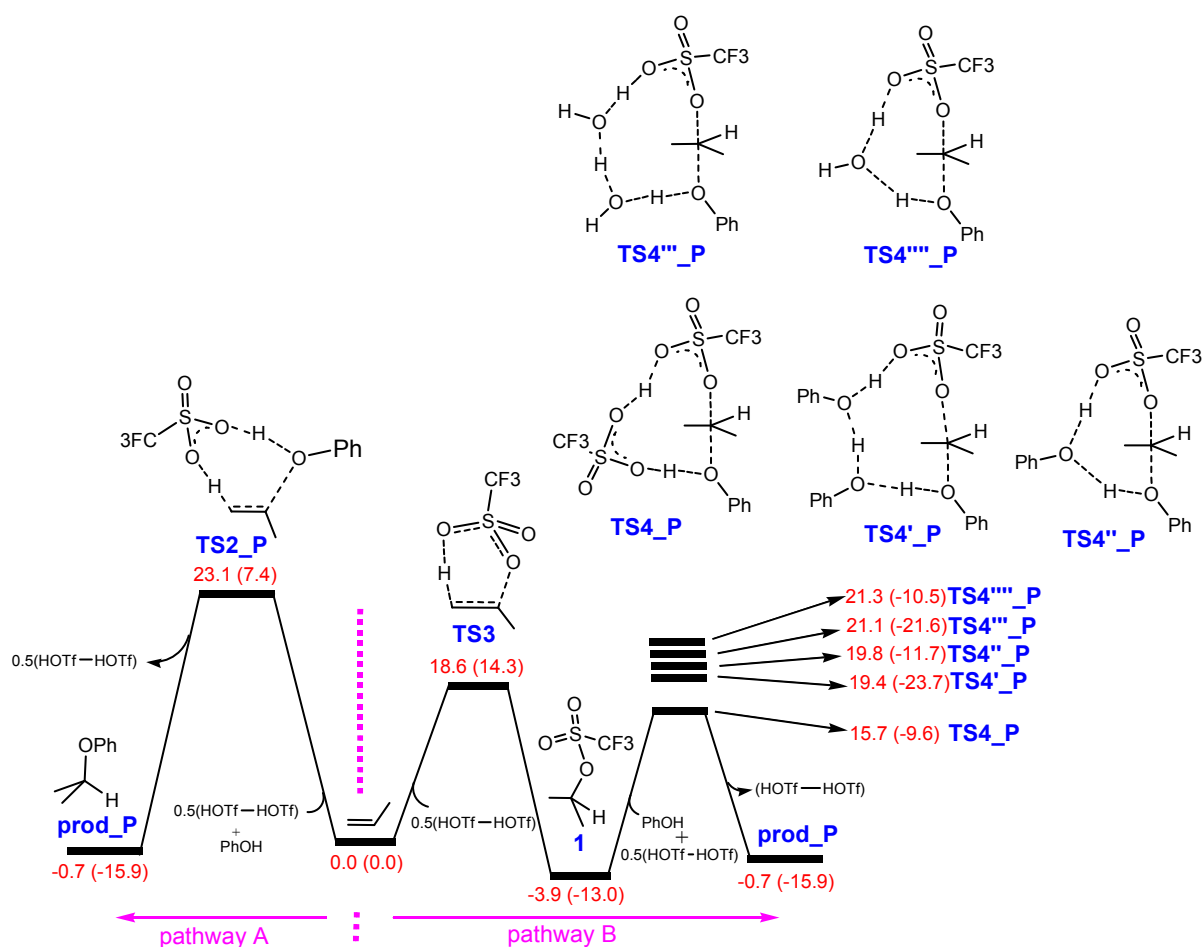

**Fig. S3** Energy profile for HOTf-catalyzed hydroaryloxylation of propene calculated at B3LYP-D3-CPCM/BS2//B3LYP-CPCM/BS1 level of theory. Free energies (potential energies) are given in kcal/mol.

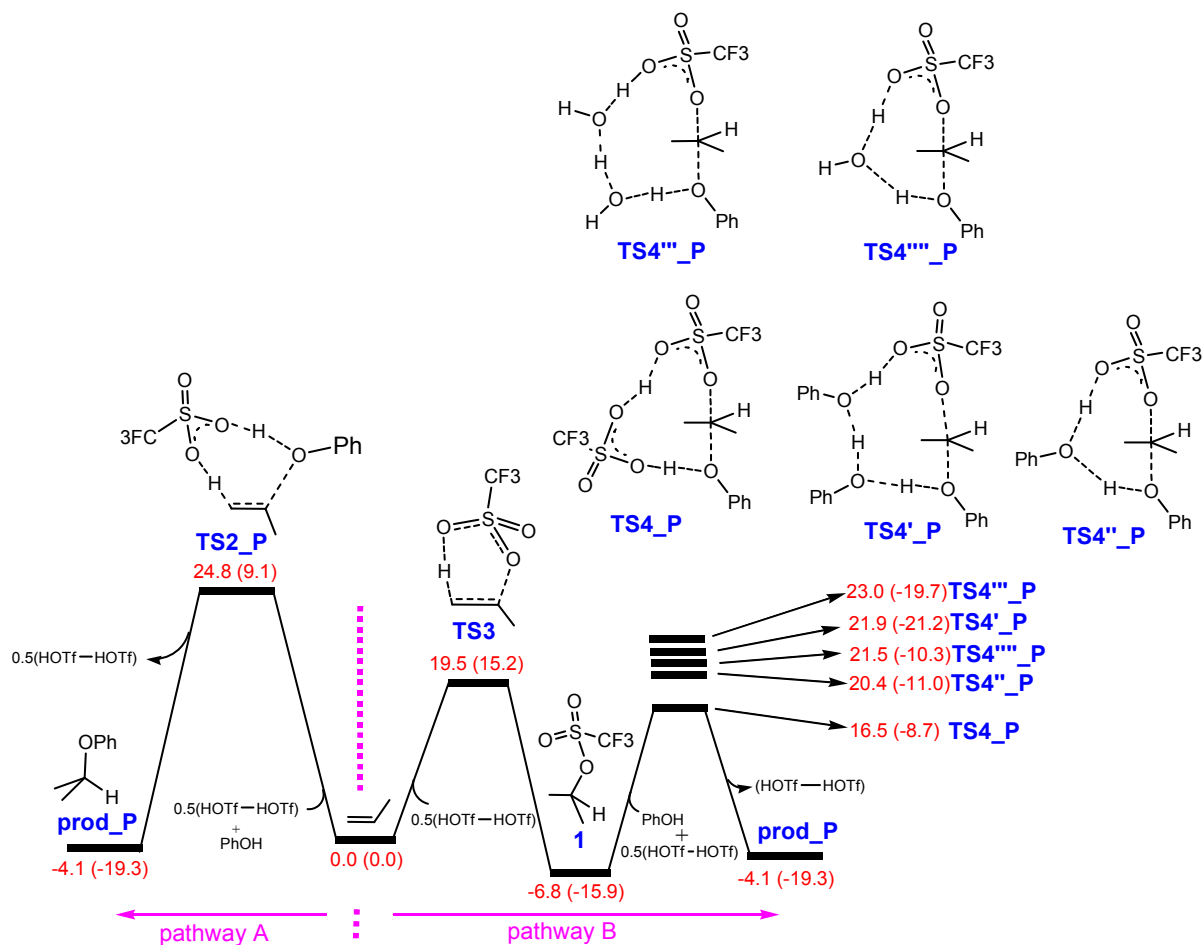

**Fig. S4** Energy profile for HOFt-catalyzed hydroaryloxylation of propene calculated at M06-D3-CPCM/BS2//B3LYP-CPCM/BS1 level of theory. Free energies (potential energies) are given in kcal/mol.

**Table S1.** Free energy changes calculated for **TS3** ( $\Delta G_D$  and  $\Delta G_F$ ), **TS7** ( $\Delta G_C$ ), **TS8** ( $\Delta G_E$ ) and **TS6** ( $\Delta G_I$ ) calculated at different levels of theory for pathways C-F and I where L =  $\text{PMe}_3$  and  $\text{PPh}_3$ . Free energies are given in kcal/mol. It follows that regardless of the method and the nature of the phosphine ligands ( $\text{PMe}_3$  or  $\text{PPh}_3$ ) used in the calculations, pathways E and F (binuclear mechanism) are the most favorable.

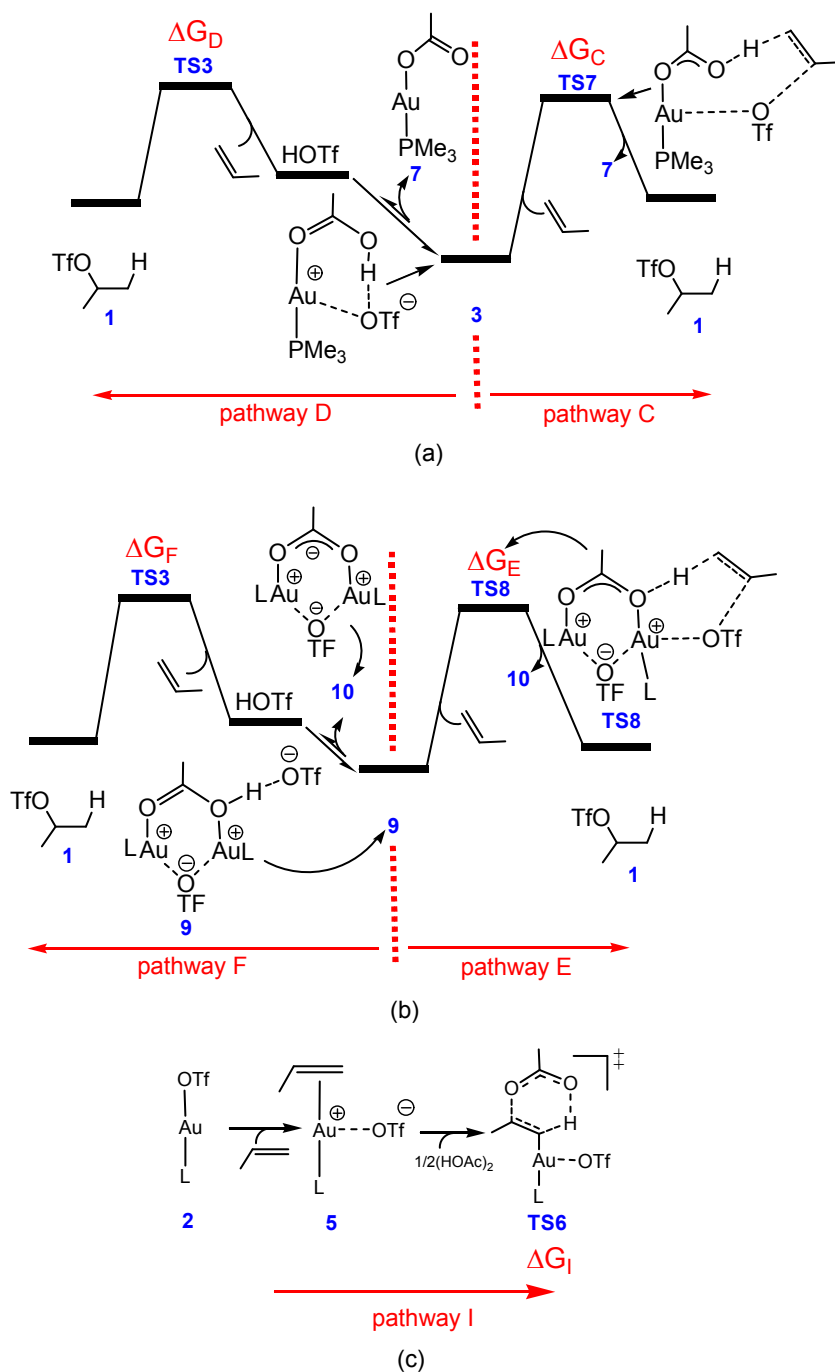

| L                | method                               | $\Delta G_C$ | $\Delta G_D$ | $\Delta G_E$ | $\Delta G_F$ | $\Delta G_I$ |
|------------------|--------------------------------------|--------------|--------------|--------------|--------------|--------------|
| PMe <sub>3</sub> | B3LYP-D3 -CPCM/BS2//B3LYP -CPCM/BS1  | 37.5         | 39.2         | 27.9         | 29.2         | 51.1         |
| PMe <sub>3</sub> | M06-D3-CPCM/BS2//B3LYP-CPCM/BS1      | 37.2         | 38.2         | 31.6         | 31.6         | 45.8         |
| PMe <sub>3</sub> | B97D-CPCM/BS2//B3LYP-CPCM/BS1        | 35.6         | 36.7         | 24.2         | 24.8         | 48.2         |
| PMe <sub>3</sub> | B3LYP-D3-CPCM/BS2//B3LYP-D3-CPCM/BS1 | 37.4         | 38.7         | 28.5         | 29.2         | 51.3         |
| PMe <sub>3</sub> | B3LYP-D3 -CPCM/BS2//B3LYP -CPCM/BS3* | 36.9         | 38.1         | 26.1         | 28.5         | 49.2         |
| PPh <sub>3</sub> | B3LYP-D3 -CPCM/BS2//B3LYP -CPCM/BS1  | 38.2         | 38.5         | 24.5         | 26.8         | 49.6         |
| PPh <sub>3</sub> | M06-D3-CPCM/BS2//B3LYP-CPCM/BS1      | 37.9         | 38.0         | 26.5         | 27.4         | 44.5         |

\* BS3 utilizes def2-SVP with its ECP for gold and 6-31G(d) for the other atoms

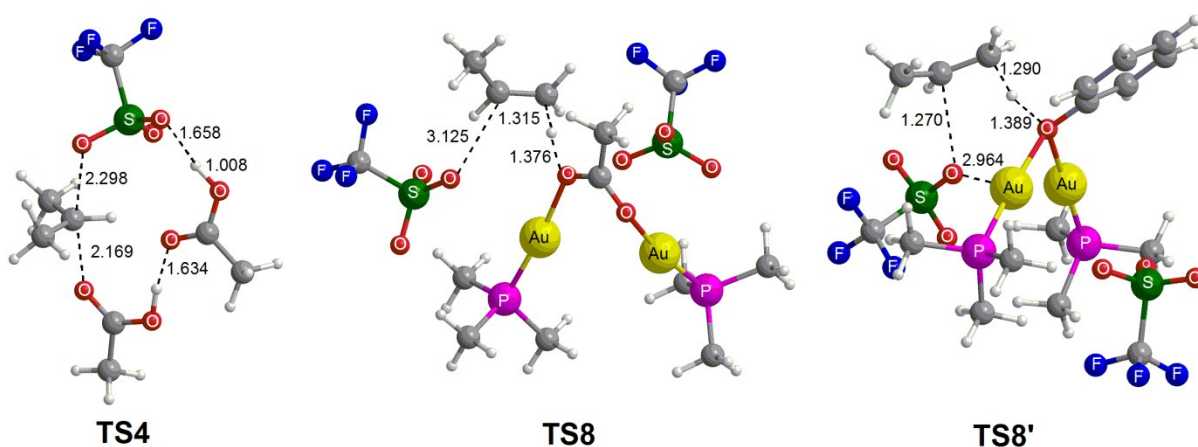

**Fig. S5** Optimized structures for TS4, TS8, TS8' along with some structural parameters (bond lengths in Å).

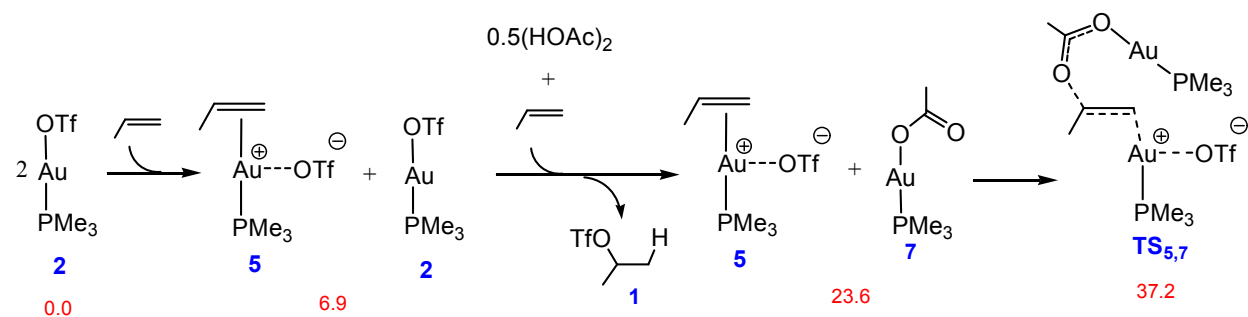

**Fig. S6** Calculated mechanism for C-O bond formation via transition structure **TS<sub>5,7</sub>** in which LAuOAc (**7**) reacts with the alkene complex **5**. Free energies are given in kcal/mol.



**Table S2.** Cartesian coordinates and total energies for all of the calculated structures in water

**1**

E (B3LYP-CPCM/BS1) = -1079.939306au

H(B3LYP-CPCM/BS1) = -1079.802629au

G(B3LYP-CPCM/BS1) = -1079.854963au

E(B3LYP-D3-CPCM/BS2//B3LYP/BS1) = -1080.352247au

|   |             |             |             |
|---|-------------|-------------|-------------|
| H | -3.49371100 | -0.85743800 | -0.79101600 |
| O | -0.91622800 | -0.15254200 | -0.68011800 |
| S | 0.38049500  | -0.88515700 | -0.08606300 |
| O | 0.13846900  | -1.39217200 | 1.25986600  |
| O | 0.92464300  | -1.71935300 | -1.14381600 |
| C | 1.51328800  | 0.58777000  | 0.09190200  |
| F | 2.64825600  | 0.19300700  | 0.66344300  |
| F | 1.76735300  | 1.11260500  | -1.10297100 |
| F | 0.91970100  | 1.50545200  | 0.86461500  |
| C | -3.10829700 | -0.71208700 | 0.22345800  |
| C | -2.00118100 | 0.32811700  | 0.23273400  |
| H | -3.93149100 | -0.37463500 | 0.86282700  |
| H | -2.74562100 | -1.66984300 | 0.60709600  |
| H | -1.56889700 | 0.41878200  | 1.23111700  |
| C | -2.40470100 | 1.69020800  | -0.30553100 |
| H | -3.20285800 | 2.10479300  | 0.31933800  |
| H | -1.55683100 | 2.38079400  | -0.28875900 |
| H | -2.77601800 | 1.60895900  | -1.33219700 |

**TS1**

E (B3LYP-CPCM/BS1) = -2290.841988au

H(B3LYP-CPCM/BS1) = -2290.370177au

G(B3LYP-CPCM/BS1) = -2290.480484au

E(B3LYP-D3-CPCM/BS2//B3LYP/BS1) = -2291.982022au

|    |             |             |             |
|----|-------------|-------------|-------------|
| C  | 5.16764600  | -1.12453200 | -0.17013100 |
| C  | 4.27318200  | -1.19610400 | -1.23396500 |
| C  | 4.42589400  | -2.10133600 | -2.27881400 |
| C  | 5.51917900  | -2.96917700 | -2.25091100 |
| C  | 6.43731200  | -2.91558600 | -1.19847300 |
| C  | 6.26090900  | -1.99404300 | -0.16377000 |
| O  | 3.15645200  | -0.32817100 | -1.28809300 |
| O  | 2.47918000  | 0.86520500  | 0.76399000  |
| C  | 2.46156600  | 2.21874900  | 1.10536100  |
| C  | 3.40297000  | 2.67728100  | 2.02824000  |
| C  | 3.44144800  | 4.03705200  | 2.34717400  |
| C  | 2.53652100  | 4.92310000  | 1.75759100  |
| C  | 1.59611500  | 4.44728300  | 0.83924100  |
| C  | 1.55619800  | 3.09361600  | 0.49957400  |
| C  | 1.22391000  | 0.06151700  | 1.07470700  |
| C  | 0.96698300  | -0.99138600 | 0.01066500  |
| Au | -1.07809200 | -1.71901100 | 0.33311900  |
| P  | -3.32846700 | -2.25438900 | 0.62146200  |
| C  | 1.42843100  | -0.49985000 | 2.47639800  |

|   |             |             |             |
|---|-------------|-------------|-------------|
| O | -2.22235700 | 1.44572700  | 0.39892900  |
| S | -2.01535100 | 1.57493500  | -1.06706200 |
| O | -0.60925200 | 1.38620100  | -1.51369200 |
| O | -3.03421300 | 0.90257800  | -1.90555100 |
| C | -2.30808200 | 3.38526800  | -1.37851300 |
| F | -2.14767700 | 3.68139600  | -2.67684500 |
| F | -3.55095100 | 3.73738900  | -1.01510100 |
| F | -1.43929300 | 4.13339500  | -0.66910400 |
| H | 0.83851400  | 2.71842200  | -0.22427300 |
| H | 0.88773500  | 5.12785200  | 0.37600300  |
| H | 2.56391600  | 5.97878100  | 2.01237700  |
| H | 4.17520000  | 4.39971800  | 3.06189800  |
| H | 4.09238600  | 1.97229700  | 2.48325000  |
| H | 0.59277300  | -0.63390100 | -0.95960500 |
| H | 1.45962700  | -1.96529700 | 0.10461800  |
| H | 0.41854500  | 0.79579600  | 1.05565400  |
| H | 2.22700100  | -1.25079600 | 2.48253700  |
| H | 0.50753800  | -0.97381000 | 2.83079600  |
| C | -3.70680100 | -3.93401400 | 1.27270900  |
| C | -4.12840500 | -1.08622100 | 1.79130300  |
| C | -4.29054800 | -2.10519000 | -0.93486400 |
| H | 3.16231100  | 0.37601400  | -0.53757100 |
| H | 2.15556100  | -0.78974900 | -0.87450400 |
| H | 3.70940200  | -2.11482700 | -3.09378200 |
| H | 5.65482700  | -3.68211800 | -3.05859000 |
| H | 7.28864000  | -3.58935600 | -1.18589300 |
| H | 6.97149900  | -1.94920600 | 0.65610000  |
| H | 5.01012300  | -0.41099200 | 0.63249000  |
| H | -5.35812400 | -2.26080200 | -0.74449100 |
| H | -4.12238700 | -1.10631900 | -1.35021100 |
| H | -3.93869000 | -2.85025900 | -1.65487200 |
| H | -4.78749000 | -4.07088000 | 1.38697300  |
| H | -3.31926400 | -4.69036500 | 0.58382600  |
| H | -3.22208600 | -4.06774600 | 2.24421500  |
| H | -5.21084100 | -1.24947000 | 1.82699800  |
| H | -3.70730800 | -1.22541100 | 2.79163600  |
| H | -3.90791200 | -0.06806300 | 1.45737800  |
| H | 1.69662900  | 0.29874000  | 3.17533800  |

## 2

E (B3LYP-CPCM/BS1) = -1558.053701au

H(B3LYP-CPCM/BS1) = -1557.891227au

G(B3LYP-CPCM/BS1) = -1557.960786au

E(B3LYP-D3-CPCM/BS2//B3LYP/BS1) = -1558.843932au

|    |            |             |             |
|----|------------|-------------|-------------|
| Au | 0.72834800 | -0.26581300 | -0.27522200 |
| P  | 2.87461300 | 0.29000800  | 0.19578500  |
| C  | 3.09169300 | 2.08344200  | 0.51974000  |
| H  | 2.45585800 | 2.37973900  | 1.35864300  |
| H  | 4.13715500 | 2.30550800  | 0.75865100  |
| H  | 2.79077000 | 2.65338300  | -0.36361700 |
| C  | 4.05543500 | -0.11508700 | -1.14932000 |

|   |             |             |             |
|---|-------------|-------------|-------------|
| H | 5.07303900  | 0.17172000  | -0.86416400 |
| H | 4.02354400  | -1.18943000 | -1.35094900 |
| H | 3.76840100  | 0.41907900  | -2.05933000 |
| C | 3.51870000  | -0.55539000 | 1.69164600  |
| H | 3.49300000  | -1.63791400 | 1.53953400  |
| H | 4.54724300  | -0.23956700 | 1.89581600  |
| H | 2.88465900  | -0.30935200 | 2.54790900  |
| O | -1.26325400 | -0.78176800 | -0.77328100 |
| S | -2.35592000 | -0.75093800 | 0.30940900  |
| O | -3.39907000 | -1.74304000 | 0.04400700  |
| O | -1.80866600 | -0.64014600 | 1.66956400  |
| C | -3.12993700 | 0.90361400  | -0.03898100 |
| F | -4.11523500 | 1.13696900  | 0.83411100  |
| F | -2.20960900 | 1.87397000  | 0.08104900  |
| F | -3.62905600 | 0.93696100  | -1.27828800 |

## TS2

E (B3LYP-CPCM/BS1) = -1308.979166au

H(B3LYP-CPCM/BS1) = -1308.779635au

G(B3LYP-CPCM/BS1) = -1308.849572au

E(B3LYP-D3-CPCM/BS2//B3LYP/BS1) = -1309.517086au

|   |             |             |             |
|---|-------------|-------------|-------------|
| C | -2.19849700 | 0.73143400  | -0.16643700 |
| F | -2.79214300 | 1.18596000  | 0.94189900  |
| F | -1.33748700 | 1.65979200  | -0.60606300 |
| S | -1.29636000 | -0.85053800 | 0.20840100  |
| O | -0.26279400 | -0.46266100 | 1.21319900  |
| F | -3.12677000 | 0.52254300  | -1.10399800 |
| O | -2.31835600 | -1.78789500 | 0.68247600  |
| O | -0.68936400 | -1.18615900 | -1.13226700 |
| C | 1.62395200  | -2.64726800 | -1.01966800 |
| C | 2.61820900  | -1.91807200 | -0.35349300 |
| H | 0.72163500  | -1.84584300 | -1.01994300 |
| H | 1.78403300  | -2.83806600 | -2.08177400 |
| H | 1.16592100  | -3.46696500 | -0.46055300 |
| H | 3.30148900  | -1.31084100 | -0.93972600 |
| O | 2.35950300  | 0.73878400  | -0.68596600 |
| C | 2.11326200  | 1.75033100  | -0.04010500 |
| O | 1.23042500  | 1.79833500  | 0.95420600  |
| C | 2.77184500  | 3.08517800  | -0.28890600 |
| H | 3.15645400  | 3.49891900  | 0.64832900  |
| H | 3.57963200  | 2.97470800  | -1.01301800 |
| H | 2.02778300  | 3.79018100  | -0.67590900 |
| H | 0.74704300  | 0.92929500  | 1.02355600  |
| C | 2.79699400  | -1.90979600 | 1.10603200  |
| H | 3.63575700  | -2.59820700 | 1.31400300  |
| H | 3.10417400  | -0.92460300 | 1.46474300  |
| H | 1.91553100  | -2.26870900 | 1.64160700  |

## TS2\_P

E (B3LYP-CPCM/BS1) = -1387.358608au

H(B3LYP-CPCM/BS1) = -1387.114783au

G(B3LYP-CPCM/BS1) = -1387.188015au

E(B3LYP-D3-CPCM/BS2//B3LYP/BS1) = -1387.922442au

|   |             |             |             |
|---|-------------|-------------|-------------|
| C | -3.46627800 | -0.58473300 | 0.37914800  |
| F | -3.67514500 | -1.90130600 | 0.48572200  |
| F | -3.51612600 | -0.03740200 | 1.59837000  |
| S | -1.80584100 | -0.27806700 | -0.39753200 |
| O | -0.85321500 | -0.92300300 | 0.55187500  |
| F | -4.43263800 | -0.05125200 | -0.37588600 |
| O | -1.87048800 | -0.86571100 | -1.74099500 |
| O | -1.72514000 | 1.22767800  | -0.36279900 |
| C | 0.34504500  | 2.72317300  | -1.41530700 |
| C | 1.39357700  | 2.70834600  | -0.47599700 |
| O | 1.49957400  | 0.38298200  | 0.93022800  |
| C | 2.54629100  | -0.38777500 | 0.50066500  |
| H | -0.42336000 | 1.95722700  | -0.92050900 |
| H | -0.26927700 | 3.62816400  | -1.42550500 |
| H | 0.56428400  | 2.30110000  | -2.39673700 |
| H | 2.24273900  | 2.05118100  | -0.64599500 |
| H | 0.64346800  | -0.10875800 | 0.82411700  |
| C | 2.35675900  | -1.61990500 | -0.14228700 |
| C | 3.46684300  | -2.34854400 | -0.57036900 |
| C | 4.76299100  | -1.86356500 | -0.37261400 |
| C | 4.94314300  | -0.63578300 | 0.26921700  |
| C | 3.84322100  | 0.10254800  | 0.70844600  |
| H | 1.34962300  | -1.99409500 | -0.29798600 |
| H | 3.31320900  | -3.30379700 | -1.06535700 |
| H | 5.62098400  | -2.43712400 | -0.71070900 |
| H | 5.94531000  | -0.25031400 | 0.43770600  |
| H | 3.97704400  | 1.04530000  | 1.23199300  |
| C | 1.42544300  | 3.52481000  | 0.74456400  |
| H | 1.60439700  | 2.87079700  | 1.60677000  |
| H | 2.30595000  | 4.18524300  | 0.68204300  |
| H | 0.52622000  | 4.12679600  | 0.88756400  |

### 3

E (B3LYP-CPCM/BS1) = -1787.153322au

H(B3LYP-CPCM/BS1) = -1786.921818au

G(B3LYP-CPCM/BS1) = -1787.003144au

E(B3LYP-D3-CPCM/BS2//B3LYP/BS1) = -1788.063134au

|    |             |             |             |
|----|-------------|-------------|-------------|
| Au | -1.07785400 | 0.80012000  | -0.05639500 |
| P  | -2.38602600 | -1.06002700 | -0.00902600 |
| C  | -4.16843000 | -0.71567800 | -0.28666100 |
| H  | -4.30479900 | -0.24413900 | -1.26381400 |
| H  | -4.74376200 | -1.64689900 | -0.24929000 |
| H  | -4.53410900 | -0.03312500 | 0.48560200  |
| C  | -2.27969200 | -1.93774800 | 1.59496000  |
| H  | -2.93481500 | -2.81554800 | 1.58769900  |
| H  | -1.24177500 | -2.25051000 | 1.74022400  |
| H  | -2.57674900 | -1.26640600 | 2.40529400  |

|   |             |             |             |
|---|-------------|-------------|-------------|
| C | -1.90121800 | -2.28935600 | -1.27858900 |
| H | -0.86587900 | -2.58437300 | -1.09025900 |
| H | -2.55256800 | -3.16785500 | -1.21939500 |
| H | -1.97744300 | -1.84380700 | -2.27412900 |
| O | 2.07116300  | 2.18382700  | 0.77314900  |
| C | 1.20442800  | 2.96077500  | 0.19164000  |
| O | 3.18155500  | -1.90350900 | 1.47330800  |
| S | 1.91035900  | -1.55545300 | 0.82661900  |
| O | 0.89282200  | -2.62147100 | 0.71482300  |
| O | 1.31857400  | -0.24381000 | 1.28592500  |
| C | 2.37305700  | -1.18809600 | -0.93758200 |
| F | 1.27508500  | -0.92571900 | -1.67606800 |
| F | 3.17632600  | -0.11385500 | -0.99677500 |
| F | 3.00538700  | -2.22990200 | -1.48584100 |
| O | 0.05446700  | 2.63425200  | -0.16775900 |
| C | 1.69972900  | 4.36052800  | -0.04667100 |
| H | 0.89950800  | 4.98532700  | -0.44264400 |
| H | 2.08354700  | 4.77961500  | 0.88821800  |
| H | 2.53216000  | 4.32923200  | -0.75800900 |
| H | 1.76471400  | 1.22510200  | 0.92519300  |

**3'**

E (B3LYP-CPCM/BS1) = -1865.525058au

H(B3LYP-CPCM/BS1) = -1865.249515au

G(B3LYP-CPCM/BS1) = -1865.335054au

E(B3LYP-D3-CPCM/BS2//B3LYP/BS1) = -1866.460883au

|    |             |             |             |
|----|-------------|-------------|-------------|
| Au | -1.34405700 | 0.27687200  | -0.29846400 |
| P  | -3.04186900 | -1.01086100 | 0.47387600  |
| C  | -4.70853300 | -0.59421200 | -0.16942700 |
| H  | -4.70827200 | -0.66550400 | -1.26052600 |
| H  | -5.45587100 | -1.28183600 | 0.24026000  |
| H  | -4.96353800 | 0.43060900  | 0.11453600  |
| C  | -3.18899900 | -0.96066900 | 2.30189400  |
| H  | -3.97750000 | -1.64303000 | 2.63673900  |
| H  | -2.23598600 | -1.25778500 | 2.74801900  |
| H  | -3.42652600 | 0.05650800  | 2.62523400  |
| C  | -2.73857100 | -2.76669100 | 0.04447900  |
| H  | -1.73627700 | -3.04085200 | 0.38523300  |
| H  | -3.48832400 | -3.41413100 | 0.51115900  |
| H  | -2.77791900 | -2.88595100 | -1.04197200 |
| O  | 0.38029600  | 1.37567500  | -1.05820800 |
| H  | 1.10144100  | 0.65816200  | -1.15994200 |
| O  | 0.72559500  | -1.76531600 | 0.36176100  |
| S  | 1.87533200  | -1.81907200 | -0.57507300 |
| O  | 2.00966300  | -3.03913100 | -1.38127800 |
| O  | 2.06970300  | -0.54270700 | -1.35232300 |
| C  | 3.35854800  | -1.81298000 | 0.54320100  |
| F  | 4.48945200  | -1.86225100 | -0.16964200 |
| F  | 3.37498600  | -0.69215800 | 1.28891100  |
| F  | 3.32284500  | -2.86638600 | 1.36950900  |
| C  | 0.86185300  | 2.51911800  | -0.41980900 |

|   |             |            |             |
|---|-------------|------------|-------------|
| C | 2.09820300  | 2.50654000 | 0.22713400  |
| C | 0.08027200  | 3.67316400 | -0.47008500 |
| C | 2.55378600  | 3.68174700 | 0.82950500  |
| H | 2.68422100  | 1.59430400 | 0.26500400  |
| C | 0.54691600  | 4.83666200 | 0.14319400  |
| H | -0.87304000 | 3.65240900 | -0.99034500 |
| C | 1.78472000  | 4.84707800 | 0.79234600  |
| H | 3.51616700  | 3.67887500 | 1.33361100  |
| H | -0.05783800 | 5.73848100 | 0.10588800  |
| H | 2.14572600  | 5.75538800 | 1.26562000  |

### TS3

E (B3LYP-CPCM/BS1) = -1079.885669au

H(B3LYP-CPCM/BS1) = -1079.756316au

G(B3LYP-CPCM/BS1) = -1079.809045au

E(B3LYP-D3-CPCM/BS2//B3LYP/BS1) = -1080.308721au

|   |             |             |             |
|---|-------------|-------------|-------------|
| H | -2.02732300 | -1.24838500 | -1.01961900 |
| C | -2.57505100 | -0.67490800 | -0.27563800 |
| C | -2.35388300 | -0.96023300 | 1.07467400  |
| H | -1.35759900 | -0.24441600 | 1.26447100  |
| H | -1.94047300 | -1.94285600 | 1.30869700  |
| H | -3.07998200 | -0.57087800 | 1.79053600  |
| O | -0.12230500 | 0.51118100  | 1.50599000  |
| S | 0.47120300  | 0.86343800  | 0.15214000  |
| O | -0.56445700 | 0.81719800  | -0.90984600 |
| O | 1.37298400  | 2.01192800  | 0.17693100  |
| C | 1.53261300  | -0.61711800 | -0.20579100 |
| F | 2.11230500  | -0.49286700 | -1.40274300 |
| F | 2.47793400  | -0.75917300 | 0.72544400  |
| F | 0.76345900  | -1.72255000 | -0.21267800 |
| C | -3.51789800 | 0.33963000  | -0.78304200 |
| H | -3.04929100 | 0.94042000  | -1.56782100 |
| H | -4.35440200 | -0.20228300 | -1.25458100 |
| H | -3.91791400 | 0.97800600  | 0.00804800  |

### 4

E (B3LYP-CPCM/BS1) = -825.535130au

H(B3LYP-CPCM/BS1) = -825.341232au

G(B3LYP-CPCM/BS1) = -825.398039au

E(B3LYP-D3-CPCM/BS2//B3LYP/BS1) = -826.070420au

|    |             |             |             |
|----|-------------|-------------|-------------|
| Au | 0.07942900  | -0.21355500 | -0.00034000 |
| P  | -2.16721900 | 0.15245500  | 0.00064200  |
| C  | -2.74155400 | 0.96317900  | 1.54036200  |
| H  | -2.23331500 | 1.92392600  | 1.65908300  |
| H  | -3.82330700 | 1.12700700  | 1.49697500  |
| H  | -2.50407400 | 0.33019100  | 2.39963000  |
| C  | -3.13610500 | -1.39418300 | -0.16128200 |
| H  | -4.20720100 | -1.16688900 | -0.15939800 |
| H  | -2.87253900 | -1.89555000 | -1.09646500 |
| H  | -2.90471300 | -2.06143700 | 0.67334900  |

|   |             |             |             |
|---|-------------|-------------|-------------|
| C | -2.69807800 | 1.23804200  | -1.37702900 |
| H | -2.42820600 | 0.77885700  | -2.33187100 |
| H | -3.78211500 | 1.38754000  | -1.33906500 |
| H | -2.19464600 | 2.20525200  | -1.29631800 |
| O | 2.20269800  | -0.65481900 | 0.00016200  |
| C | 3.11990100  | 0.17265200  | -0.00026100 |
| C | 4.56317900  | -0.23785700 | 0.00235200  |
| H | 5.06797700  | 0.16667300  | -0.88220000 |
| H | 5.06367400  | 0.16484600  | 0.89023200  |
| O | 2.81658300  | 1.46377600  | -0.00271000 |
| H | 4.63981900  | -1.32444100 | 0.00156100  |
| H | 3.61375000  | 2.02536200  | -0.00273400 |

#### TS4

E (B3LYP-CPCM/BS1) = -1538.095929au

H(B3LYP-CPCM/BS1) = -1537.823272au

G(B3LYP-CPCM/BS1) = -1537.908746au

E(B3LYP-D3-CPCM/BS2//B3LYP/BS1) = -1538.747620au

|   |             |             |             |
|---|-------------|-------------|-------------|
| H | -0.30158800 | -3.30874400 | 0.33350700  |
| O | -1.24230600 | -0.86470200 | 0.86295600  |
| S | -1.81131000 | 0.12112200  | -0.11447900 |
| O | -1.87619200 | 1.51454500  | 0.41518900  |
| O | -1.29536100 | -0.01782100 | -1.48627100 |
| C | -3.60147000 | -0.36801900 | -0.19628200 |
| F | -4.25725400 | 0.43829300  | -1.03808700 |
| F | -3.70681600 | -1.62862800 | -0.63693300 |
| F | -4.16610800 | -0.28572500 | 1.01342400  |
| C | 0.47445600  | -2.79684000 | -0.24391000 |
| C | 0.90980700  | -1.58010000 | 0.48939900  |
| H | 1.32618200  | -3.48023200 | -0.32908700 |
| H | 0.09357900  | -2.55268400 | -1.23603800 |
| H | 0.92078400  | -0.62772000 | -0.01303000 |
| C | 1.22672700  | -1.63646600 | 1.94096400  |
| H | 1.84991000  | -2.50826000 | 2.16219000  |
| H | 1.71387000  | -0.72280900 | 2.28547000  |
| H | 0.28245900  | -1.75469100 | 2.48305000  |
| C | 3.91597700  | -0.98609100 | -0.36493200 |
| O | 3.85570900  | 0.32706900  | -0.31243600 |
| O | 2.97928100  | -1.76020300 | -0.13314700 |
| C | 5.27919100  | -1.50001700 | -0.75017000 |
| H | 5.28964600  | -2.58965600 | -0.73264600 |
| H | 5.53246100  | -1.14114500 | -1.75331300 |
| H | 6.03105500  | -1.10406300 | -0.06022200 |
| H | 2.94321300  | 0.69378900  | -0.08893800 |
| C | 1.34693400  | 2.68105700  | 0.15758900  |
| O | 0.15420700  | 3.22552600  | 0.23510000  |
| O | 1.52654400  | 1.45781300  | 0.19411200  |
| C | 2.45778600  | 3.68864700  | 0.01699000  |
| H | 3.42992700  | 3.19463400  | 0.01440400  |
| H | 2.32546500  | 4.24589100  | -0.91639900 |
| H | 2.40752100  | 4.41081500  | 0.83771000  |

H -0.56342600 2.52061900 0.29745100

**TS4\_P**

E (B3LYP-CPCM/BS1) = -2349.388330au

H(B3LYP-CPCM/BS1) = -2349.092835au

G(B3LYP-CPCM/BS1) = -2349.187671au

E(B3LYP-D3-CPCM/BS2//B3LYP/BS1) = -2350.320044au

|   |             |             |             |
|---|-------------|-------------|-------------|
| H | -0.47155700 | -3.86046700 | 1.59056700  |
| O | -2.51341600 | -1.29371200 | 1.22204200  |
| S | -2.90647500 | -0.21690700 | 0.26667300  |
| O | -3.99120400 | 0.66712100  | 0.69455400  |
| O | -1.69966900 | 0.48041200  | -0.31827200 |
| C | -3.54225100 | -1.14991500 | -1.20877700 |
| F | -3.85442800 | -0.30514400 | -2.19336700 |
| F | -2.60286900 | -2.00281500 | -1.65094200 |
| F | -4.62889500 | -1.84695200 | -0.86681100 |
| C | -0.21916500 | -3.07984900 | 0.86883400  |
| C | -0.18446800 | -1.73788800 | 1.48186700  |
| H | 0.77442000  | -3.30289800 | 0.44960200  |
| H | -0.91859600 | -3.08693600 | 0.02916300  |
| H | -0.22318400 | -0.87865600 | 0.82715200  |
| C | -0.22199800 | -1.54428100 | 2.94663700  |
| H | 0.44813700  | -2.25282200 | 3.44421800  |
| H | 0.01139300  | -0.51930500 | 3.23827500  |
| H | -1.24375300 | -1.77884500 | 3.27282600  |
| O | 2.02805500  | -1.24135200 | 1.40369800  |
| H | 1.90369300  | -0.27251900 | 1.30146000  |
| C | 2.81988700  | -1.73664900 | 0.38625200  |
| C | 3.37191600  | -3.00876300 | 0.56764400  |
| C | 3.05133100  | -1.01212700 | -0.78781700 |
| C | 4.16932000  | -3.55649100 | -0.43920700 |
| H | 3.19172400  | -3.53982900 | 1.49718300  |
| C | 3.85947400  | -1.56901100 | -1.77877800 |
| H | 2.60726300  | -0.03091400 | -0.92300000 |
| C | 4.41772500  | -2.84010900 | -1.61195700 |
| H | 4.60298300  | -4.54234400 | -0.29882800 |
| H | 4.04822700  | -1.00604900 | -2.68824200 |
| H | 5.04247500  | -3.26707300 | -2.39052000 |
| O | -0.87338900 | 2.73374700  | 0.48665600  |
| O | 1.07766500  | 1.35919900  | 1.25116300  |
| H | -1.25018100 | 1.80398100  | 0.18666300  |
| S | 0.65554500  | 2.70592900  | 0.83659900  |
| O | 0.98856900  | 3.85835800  | 1.65259200  |
| C | 1.42250400  | 2.96120200  | -0.84179300 |
| F | 1.07585400  | 4.14487900  | -1.33124100 |
| F | 1.00484700  | 1.99131000  | -1.66244100 |
| F | 2.74919000  | 2.89021500  | -0.72028400 |

**TS4'**

E (B3LYP-CPCM/BS1) = -2271.008686au



H(B3LYP-CPCM/BS1) = -2270.757394au

G(B3LYP-CPCM/BS1) = -2270.850957au

E(B3LYP-D3-CPCM/BS2//B3LYP/BS1) = -2271.913462au

|   |             |             |             |
|---|-------------|-------------|-------------|
| H | 1.69454900  | 3.86400500  | 0.29035800  |
| O | 2.00258100  | 1.25621400  | 0.81693200  |
| S | 2.09959900  | -0.02571400 | 0.05022000  |
| O | 1.93605200  | -1.24192600 | 0.91662100  |
| O | 1.34159800  | -0.05016300 | -1.20928400 |
| C | 3.89544800  | -0.11956800 | -0.41796400 |
| F | 4.12486400  | -1.24537300 | -1.09799500 |
| F | 4.20442200  | 0.92780400  | -1.19056000 |
| F | 4.66350700  | -0.09900800 | 0.67378000  |
| C | 0.81173300  | 3.54126200  | -0.27011600 |
| C | 0.09611500  | 2.49052300  | 0.49641400  |
| H | 0.15122900  | 4.40990900  | -0.36947500 |
| H | 1.10713400  | 3.19237400  | -1.26017800 |
| H | -0.17617700 | 1.57280900  | 0.00157300  |
| C | -0.17635200 | 2.65571100  | 1.94634800  |
| H | -0.56832300 | 3.65811600  | 2.14487800  |
| H | -0.85964200 | 1.89418900  | 2.32334900  |
| H | 0.77869400  | 2.56582100  | 2.47595500  |
| C | -2.96835700 | 2.65225900  | -0.44118300 |
| O | -3.25170400 | 1.36981000  | -0.29447500 |
| O | -1.89281300 | 3.18000800  | -0.14471500 |
| C | -4.11191000 | 3.43910800  | -1.02205600 |
| H | -3.83735800 | 4.48995200  | -1.11002500 |
| H | -4.36815800 | 3.03520900  | -2.00704300 |
| H | -4.99431400 | 3.33151300  | -0.38337900 |
| H | -2.51193300 | 0.85142000  | 0.10947800  |
| O | -0.22518100 | -2.49103900 | 1.26888700  |
| O | -1.37914200 | -0.31970900 | 0.83269100  |
| H | 0.63080400  | -1.91528600 | 1.07008200  |
| S | -1.57811000 | -1.78150700 | 0.93197300  |
| O | -2.64166200 | -2.31188000 | 1.76558000  |
| C | -1.89304000 | -2.36112900 | -0.81302500 |
| F | -2.16417800 | -3.66239400 | -0.80861600 |
| F | -0.82456400 | -2.12184200 | -1.56474600 |
| F | -2.94071500 | -1.68296600 | -1.28842400 |

#### TS4'\_P

E (B3LYP-CPCM/BS1) = -2002.329493au

H(B3LYP-CPCM/BS1) = -2001.854604au

G(B3LYP-CPCM/BS1) = -2001.963557au

E(B3LYP-D3-CPCM/BS2//B3LYP/BS1) = -2003.177757au

|   |            |             |             |
|---|------------|-------------|-------------|
| H | 1.69690500 | -3.64863000 | -0.40419700 |
| O | 2.29178700 | -1.32034700 | -1.88731200 |
| S | 2.84463200 | -0.06384500 | -1.28676500 |
| O | 3.27021800 | 0.96021200  | -2.24576200 |
| O | 2.01730800 | 0.41500800  | -0.13424000 |
| C | 4.39705500 | -0.63602200 | -0.44283100 |

|   |             |             |             |
|---|-------------|-------------|-------------|
| F | 4.97658100  | 0.38677500  | 0.19497300  |
| F | 4.11197800  | -1.59464600 | 0.45320800  |
| F | 5.25550700  | -1.13157800 | -1.34024800 |
| C | 1.00494000  | -2.94609500 | 0.07171100  |
| C | 0.30503800  | -2.15869500 | -0.96631100 |
| H | 0.27143000  | -3.55169200 | 0.62362300  |
| H | 1.54072400  | -2.30837500 | 0.77447100  |
| H | 0.22512300  | -1.09043300 | -0.84271500 |
| C | -0.16090100 | -2.77885600 | -2.22845200 |
| H | -0.48036400 | -3.81287500 | -2.06966500 |
| H | -0.95789400 | -2.19997900 | -2.69843000 |
| H | 0.69926900  | -2.79245600 | -2.90976100 |
| O | -1.75034300 | -2.05597100 | -0.10878800 |
| H | -1.88567200 | -1.06935700 | -0.17393700 |
| O | -2.06966700 | 0.58707500  | -0.45578500 |
| H | -1.32335100 | 1.21603500  | -0.26123600 |
| C | -2.05076800 | -2.50617200 | 1.15875000  |
| C | -2.20786300 | -3.88526100 | 1.33581400  |
| C | -2.18631000 | -1.62530500 | 2.23841200  |
| C | -2.50128400 | -4.38341900 | 2.60674000  |
| H | -2.12168400 | -4.54526200 | 0.47798900  |
| C | -2.49183300 | -2.13786500 | 3.49903200  |
| H | -2.06588400 | -0.55677500 | 2.08664300  |
| C | -2.64509100 | -3.51451600 | 3.69064100  |
| H | -2.62552000 | -5.45371200 | 2.74455100  |
| H | -2.60580600 | -1.45519500 | 4.33623700  |
| H | -2.87771800 | -3.90520100 | 4.67665800  |
| C | -2.81554900 | 1.00960700  | -1.53665900 |
| C | -2.47830400 | 2.16224400  | -2.25374700 |
| C | -3.92927600 | 0.24571500  | -1.89859700 |
| C | -3.27136500 | 2.54801400  | -3.33650600 |
| H | -1.60458700 | 2.74024600  | -1.96789400 |
| C | -4.70934500 | 0.64300000  | -2.98491000 |
| H | -4.17508800 | -0.64574000 | -1.32891500 |
| C | -4.38734700 | 1.79476500  | -3.70820700 |
| H | -3.00801200 | 3.44369300  | -3.89252000 |
| H | -5.57472300 | 0.04792800  | -3.26395600 |
| H | -4.99861900 | 2.10066200  | -4.55203600 |
| O | 0.02982800  | 2.20257300  | 0.07654100  |
| H | 0.84494300  | 1.65513800  | -0.07051900 |
| C | 0.11743800  | 2.90655000  | 1.25744500  |
| C | 1.27362100  | 2.87745000  | 2.04473300  |
| C | -0.98916600 | 3.66763500  | 1.64724900  |
| C | 1.31243300  | 3.61807200  | 3.22787900  |
| H | 2.12415100  | 2.27948900  | 1.73121100  |
| C | -0.93507600 | 4.40088600  | 2.83264400  |
| H | -1.87585100 | 3.67984800  | 1.02011700  |
| C | 0.21357000  | 4.38143900  | 3.62906900  |
| H | 2.21170500  | 3.59472600  | 3.83766700  |
| H | -1.79648100 | 4.99177700  | 3.13247000  |
| H | 0.25154300  | 4.95529500  | 4.55036700  |

**TS4''**

E (B3LYP-CPCM/BS1) = -1385.425470au

H(B3LYP-CPCM/BS1) = -1385.194345au

G(B3LYP-CPCM/BS1) = -1385.268194au

E(B3LYP-D3-CPCM/BS2//B3LYP/BS1) = -1386.013854au

|   |             |             |             |
|---|-------------|-------------|-------------|
| H | -0.14604800 | 2.69451200  | 1.16219900  |
| O | 1.05860800  | 0.31219100  | 1.23904900  |
| S | 1.82842200  | -0.64835500 | 0.37366900  |
| O | 2.78730900  | -1.48375600 | 1.10278900  |
| O | 0.96140200  | -1.34417400 | -0.62144800 |
| C | 2.85619100  | 0.47003100  | -0.69553000 |
| F | 3.60018500  | -0.25167700 | -1.53875700 |
| F | 2.06345400  | 1.28440200  | -1.41303200 |
| F | 3.66202100  | 1.22034700  | 0.06341700  |
| C | -0.74746000 | 2.22177600  | 0.37975600  |
| C | -1.08279500 | 0.83049400  | 0.78718000  |
| H | -1.67656100 | 2.79355600  | 0.28501400  |
| H | -0.20327200 | 2.24869100  | -0.56433400 |
| H | -0.92015800 | 0.02088000  | 0.09804500  |
| C | -1.54946500 | 0.54240800  | 2.17141100  |
| H | -2.32440200 | 1.25718300  | 2.46425900  |
| H | -1.92611300 | -0.47695800 | 2.26907500  |
| H | -0.69984500 | 0.67272900  | 2.84937800  |
| C | -3.84893200 | 0.06972200  | -0.53545700 |
| O | -3.62951800 | -1.21606000 | -0.66892100 |
| O | -3.06712500 | 0.89544700  | -0.04196600 |
| C | -5.19782000 | 0.49612000  | -1.05631600 |
| H | -5.26362300 | 0.26654800  | -2.12494500 |
| H | -5.98383500 | -0.07314800 | -0.55001500 |
| H | -5.34493200 | 1.56399400  | -0.89575400 |
| H | -2.72986300 | -1.54974000 | -0.34104500 |
| O | -1.44167000 | -2.43760100 | 0.03329100  |
| H | -1.36289600 | -2.77943100 | 0.93703000  |
| H | -0.53449500 | -2.13447200 | -0.22088800 |

**TS4''\_P**

E (B3LYP-CPCM/BS1) = -1694.849193au

H(B3LYP-CPCM/BS1) = -1694.487901au

G(B3LYP-CPCM/BS1) = -1694.577551au

E(B3LYP-D3-CPCM/BS2//B3LYP/BS1) = -1695.555789au

|   |             |             |             |
|---|-------------|-------------|-------------|
| H | -0.39925900 | -2.89585300 | 1.33939600  |
| O | -2.12544200 | -0.81255800 | 1.42490900  |
| S | -2.62555800 | -0.34641600 | 0.09152800  |
| O | -3.74881200 | 0.59541100  | 0.13443700  |
| O | -1.51602400 | 0.01196200  | -0.84780900 |
| C | -3.29509500 | -1.90280900 | -0.66927200 |
| F | -3.71024000 | -1.67326800 | -1.91860500 |
| F | -2.33530400 | -2.84387500 | -0.70096400 |
| F | -4.32138300 | -2.36561400 | 0.05238600  |
| C | 0.43767600  | -2.36954500 | 1.81109200  |

|   |             |             |             |
|---|-------------|-------------|-------------|
| C | 0.24594400  | -0.91969600 | 1.61929400  |
| H | 0.52757300  | -2.65424100 | 2.86180200  |
| H | 1.34215400  | -2.68710100 | 1.27068000  |
| H | -0.00913000 | -0.58745800 | 0.62832700  |
| C | 0.25790400  | 0.02822300  | 2.75374600  |
| H | 1.13839300  | -0.14830200 | 3.38081100  |
| H | 0.21724200  | 1.07046200  | 2.43481700  |
| H | -0.62609500 | -0.18866900 | 3.36689800  |
| O | 2.24106900  | -0.19251300 | 0.86104000  |
| H | 1.82741500  | 0.49060300  | 0.26758800  |
| O | 0.75026500  | 1.50549500  | -0.68217100 |
| H | -0.13267200 | 1.07205800  | -0.80248900 |
| C | 3.05242300  | -1.03384400 | 0.12922000  |
| C | 3.87541900  | -1.91517200 | 0.83893100  |
| C | 3.05289500  | -1.02032000 | -1.27063100 |
| C | 4.70850700  | -2.78737500 | 0.13615000  |
| H | 3.86798100  | -1.89334500 | 1.92438000  |
| C | 3.89838900  | -1.89184800 | -1.95717700 |
| H | 2.40644400  | -0.33096100 | -1.80600100 |
| C | 4.72467200  | -2.77892700 | -1.26065000 |
| H | 5.35089900  | -3.46980800 | 0.68533400  |
| H | 3.90628900  | -1.87823100 | -3.04329700 |
| H | 5.37685000  | -3.45677800 | -1.80302200 |
| C | 0.59895900  | 2.85890500  | -0.45570700 |
| C | -0.66648500 | 3.45194800  | -0.39731000 |
| C | 1.75548600  | 3.62564500  | -0.28841200 |
| C | -0.76362200 | 4.82636200  | -0.16970900 |
| H | -1.55894500 | 2.84565600  | -0.52484600 |
| C | 1.64097500  | 4.99713800  | -0.05988500 |
| H | 2.72786500  | 3.14471900  | -0.34361200 |
| C | 0.38363100  | 5.60479700  | 0.00011200  |
| H | -1.74693200 | 5.28638700  | -0.12446400 |
| H | 2.54112000  | 5.59205800  | 0.06913000  |
| H | 0.29956900  | 6.67300700  | 0.17678000  |

### TS4'''\_P

E (B3LYP-CPCM/BS1) = -1540.234311au

H(B3LYP-CPCM/BS1) = -1539.931511au

G(B3LYP-CPCM/BS1) = -1540.015052au

E(B3LYP-D3-CPCM/BS2//B3LYP/BS1) = -1540.903003au

|   |             |             |             |
|---|-------------|-------------|-------------|
| H | 0.62588700  | -0.66341200 | 3.11301800  |
| O | -2.02481900 | 0.21846800  | 1.32516900  |
| S | -2.72463100 | 0.22060200  | -0.00229700 |
| O | -4.10376000 | 0.71850400  | 0.02394500  |
| O | -1.85538100 | 0.73589100  | -1.10332300 |
| C | -2.85509100 | -1.58756700 | -0.40509500 |
| F | -3.35639200 | -1.76323900 | -1.63142800 |
| F | -1.63608200 | -2.15646300 | -0.35479800 |
| F | -3.64623300 | -2.20400000 | 0.47957800  |
| C | 0.57505500  | -0.76877100 | 2.02678000  |
| C | 0.27826500  | 0.51177200  | 1.34694500  |

|   |             |             |             |
|---|-------------|-------------|-------------|
| H | 1.52756000  | -1.17064000 | 1.65610100  |
| H | -0.19301200 | -1.49733500 | 1.75344300  |
| H | 0.08151600  | 0.48349100  | 0.28449800  |
| C | 0.14558700  | 1.78651200  | 2.09601900  |
| H | 1.06082500  | 1.96456900  | 2.67120500  |
| H | -0.06337000 | 2.63336100  | 1.44045100  |
| H | -0.67465000 | 1.67655300  | 2.81362700  |
| O | 2.32988000  | 1.07190200  | 0.64672400  |
| H | 2.08661200  | 1.75757500  | -0.06413800 |
| O | 1.70800600  | 2.84145100  | -1.17373200 |
| H | 0.72798500  | 3.04622300  | -1.16805100 |
| C | 3.17099500  | 0.11837400  | 0.12314600  |
| C | 3.94280800  | -0.63434000 | 1.01743400  |
| C | 3.25363000  | -0.11382500 | -1.25675300 |
| C | 4.79543900  | -1.62540100 | 0.52680600  |
| H | 3.88349300  | -0.41887900 | 2.07993500  |
| C | 4.11860200  | -1.09922500 | -1.73178000 |
| H | 2.65620600  | 0.48296100  | -1.93880900 |
| C | 4.88715500  | -1.86192000 | -0.84644900 |
| H | 5.39469300  | -2.20634900 | 1.22229500  |
| H | 4.18775000  | -1.27448300 | -2.80182700 |
| H | 5.55383200  | -2.63080300 | -1.22543700 |
| O | -0.91282700 | 3.30222200  | -0.96377400 |
| H | -1.33907900 | 2.41360500  | -1.04327700 |
| H | -1.32526000 | 3.84529700  | -1.65356100 |
| H | 2.14798400  | 3.68079700  | -0.96527600 |

#### TS4''''\_P

E (B3LYP-CPCM/BS1) = -1463.801988au

H(B3LYP-CPCM/BS1) = -1463.526592au

G(B3LYP-CPCM/BS1) = -1463.602787au

E(B3LYP-D3-CPCM/BS2//B3LYP/BS1) = -1464.418257au

|   |             |             |             |
|---|-------------|-------------|-------------|
| H | 0.10829400  | -0.31696400 | -2.13783300 |
| O | 2.03623000  | 1.09364600  | -0.84765600 |
| S | 2.61805500  | 0.39427300  | 0.34499600  |
| O | 3.88444000  | 0.94765600  | 0.83505800  |
| O | 1.59519500  | 0.07854200  | 1.38631500  |
| C | 3.03615500  | -1.28410200 | -0.33011100 |
| F | 3.48512800  | -2.08489600 | 0.64162200  |
| F | 1.94135100  | -1.84601300 | -0.87549600 |
| F | 3.97554100  | -1.18238700 | -1.27669100 |
| C | -0.63974300 | 0.47458700  | -2.03186500 |
| C | -0.31920000 | 1.28403000  | -0.83932600 |
| H | -0.70115200 | 1.07172900  | -2.94475100 |
| H | -1.60524000 | -0.02924100 | -1.87185900 |
| H | -0.02483500 | 0.75780700  | 0.05154700  |
| C | -0.26131300 | 2.76244100  | -0.89031100 |
| H | -1.15399900 | 3.15780100  | -1.38607900 |
| H | -0.14641500 | 3.20894700  | 0.09847900  |
| H | 0.60496300  | 3.03638200  | -1.50476700 |
| O | -2.22753200 | 1.32136400  | 0.32937400  |

|   |             |             |             |
|---|-------------|-------------|-------------|
| H | -1.74247800 | 1.27154200  | 1.21055200  |
| O | -0.71137400 | 1.12530300  | 2.50506700  |
| H | 0.16773500  | 0.77731100  | 2.22362000  |
| C | -3.13950800 | 0.29769400  | 0.21735200  |
| C | -4.02833300 | 0.33637000  | -0.86381800 |
| C | -3.18456000 | -0.75402800 | 1.14198900  |
| C | -4.96903700 | -0.68380200 | -1.01562200 |
| H | -3.98593400 | 1.17117200  | -1.55685300 |
| C | -4.13694200 | -1.76018800 | 0.98097900  |
| H | -2.48979600 | -0.76945000 | 1.97637500  |
| C | -5.02844200 | -1.73347800 | -0.09602400 |
| H | -5.66078200 | -0.65135800 | -1.85262300 |
| H | -4.17828300 | -2.57192200 | 1.70182200  |
| H | -5.76387600 | -2.52343100 | -0.21519800 |
| H | -0.52540800 | 1.95173900  | 2.97799900  |

## 5

E (B3LYP-CPCM/BS1) = -1675.962651au

H(B3LYP-CPCM/BS1) = -1675.712610au

G(B3LYP-CPCM/BS1) = -1675.792027au

E(B3LYP-D3-CPCM/BS2//B3LYP/BS1) = -1676.816609au

|    |             |             |             |
|----|-------------|-------------|-------------|
| Au | -1.10774200 | -0.35909400 | -0.03652800 |
| P  | -1.30305900 | 1.96580700  | 0.15001800  |
| C  | -3.01774600 | 2.55659000  | 0.45392200  |
| H  | -3.39570000 | 2.12504500  | 1.38507000  |
| H  | -3.03621600 | 3.64922500  | 0.52763500  |
| H  | -3.66628500 | 2.23947700  | -0.36769400 |
| C  | -0.73047400 | 2.83181000  | -1.36020200 |
| H  | -0.83196700 | 3.91535400  | -1.23591600 |
| H  | 0.32094900  | 2.57264800  | -1.51298100 |
| H  | -1.31854700 | 2.50648300  | -2.22289900 |
| C  | -0.28751400 | 2.64502700  | 1.51690900  |
| H  | 0.75341200  | 2.37062700  | 1.32731400  |
| H  | -0.38307000 | 3.73553500  | 1.55361800  |
| H  | -0.61242100 | 2.21800300  | 2.46981500  |
| O  | 3.77132000  | 0.00899700  | -1.54473200 |
| S  | 2.51521600  | 0.29065700  | -0.83036600 |
| O  | 2.28773200  | 1.70498000  | -0.43998000 |
| O  | 1.30962900  | -0.38944100 | -1.38944100 |
| C  | 2.73264000  | -0.56115600 | 0.81030200  |
| F  | 1.71161800  | -0.26044000 | 1.64696100  |
| F  | 2.74753800  | -1.90020800 | 0.66186300  |
| F  | 3.87221000  | -0.19040100 | 1.40489400  |
| C  | -0.66278700 | -2.60022800 | -0.33951300 |
| H  | -0.62875600 | -2.70216700 | -1.42216000 |
| H  | 0.28893800  | -2.65302000 | 0.18166900  |
| C  | -1.85498600 | -2.64174000 | 0.33753000  |
| H  | -1.82578800 | -2.68019600 | 1.42641300  |
| C  | -3.20071400 | -2.85209100 | -0.29769800 |
| H  | -3.53603400 | -3.87580700 | -0.08234900 |
| H  | -3.95246400 | -2.17415400 | 0.11900200  |

H -3.16423600 -2.72237900 -1.38297100

## TS5

E (B3LYP-CPCM/BS1) = -1308.988224au

H(B3LYP-CPCM/BS1) = -1308.784348au

G(B3LYP-CPCM/BS1) = -1308.853311au

E(B3LYP-D3-CPCM/BS2//B3LYP/BS1) = -1309.524727au

|   |             |             |             |
|---|-------------|-------------|-------------|
| H | 0.88082300  | 2.82158500  | 1.28956500  |
| O | -1.04883400 | 1.47602700  | 0.29019800  |
| S | -1.50080100 | 0.13821100  | 0.81492300  |
| O | -0.35617600 | -0.77967600 | 1.10289400  |
| O | -2.54904700 | 0.19306200  | 1.83420900  |
| C | -2.27543000 | -0.63664800 | -0.68439300 |
| F | -2.67810300 | -1.88173000 | -0.41599200 |
| F | -3.32381100 | 0.08193000  | -1.09608300 |
| F | -1.36835900 | -0.68228200 | -1.67794500 |
| C | 1.57360800  | 2.01135500  | 1.04057800  |
| C | 1.13773100  | 1.40038600  | -0.24397100 |
| H | 2.56880400  | 2.45244400  | 0.92052900  |
| H | 1.57996700  | 1.28877800  | 1.85750500  |
| H | 0.77583000  | 0.39771100  | -0.28677200 |
| C | 1.13182300  | 2.19894500  | -1.49524600 |
| H | 2.16967800  | 2.36820500  | -1.80657300 |
| H | 0.59222800  | 1.69345800  | -2.29731300 |
| H | 0.68733300  | 3.18174100  | -1.30735400 |
| C | 3.15363900  | -0.84566800 | -0.03857700 |
| O | 2.26196300  | -1.54443800 | 0.64473200  |
| O | 2.97806000  | 0.28149400  | -0.51585900 |
| C | 4.46233300  | -1.57381900 | -0.18751100 |
| H | 5.16514900  | -0.96855500 | -0.75955700 |
| H | 4.87362300  | -1.79130400 | 0.80359800  |
| H | 4.29349200  | -2.53153300 | -0.69005400 |
| H | 1.36838900  | -1.12422900 | 0.75317400  |

## 6

E (B3LYP-CPCM/BS1) = -714.362688au

H(B3LYP-CPCM/BS1) = -714.149983au

G(B3LYP-CPCM/BS1) = -714.207312au

E(B3LYP-D3-CPCM/BS2//B3LYP/BS1) = -714.841016au

|    |             |             |             |
|----|-------------|-------------|-------------|
| Au | -0.39571500 | -0.19765600 | 0.01384200  |
| P  | 1.91642100  | 0.16553500  | -0.00804500 |
| C  | 2.37287200  | 1.78326400  | -0.74152900 |
| H  | 1.91527900  | 2.59074500  | -0.16362200 |
| H  | 3.46091700  | 1.90552100  | -0.73716700 |
| H  | 2.00681000  | 1.83565800  | -1.77052900 |
| C  | 2.80299300  | -1.10788200 | -0.98615000 |
| H  | 3.87929100  | -0.90688200 | -0.97613700 |
| H  | 2.61567000  | -2.09658600 | -0.55819700 |
| H  | 2.44210200  | -1.09692800 | -2.01834900 |
| C  | 2.66279200  | 0.13243200  | 1.66681200  |

|   |             |             |             |
|---|-------------|-------------|-------------|
| H | 2.47236900  | -0.83715500 | 2.13515200  |
| H | 3.74337100  | 0.29637400  | 1.59911300  |
| H | 2.21587600  | 0.91576500  | 2.28509400  |
| C | -2.54213200 | -1.02188100 | -0.25372000 |
| H | -2.66554400 | -1.06279100 | -1.33425500 |
| H | -2.44457700 | -1.97031400 | 0.26940900  |
| C | -2.78848100 | 0.13681600  | 0.43887700  |
| H | -2.79818500 | 0.08904600  | 1.52789800  |
| C | -3.22005500 | 1.43598200  | -0.17292600 |
| H | -4.27601800 | 1.60244700  | 0.07978500  |
| H | -2.66004600 | 2.28048400  | 0.24232400  |
| H | -3.12011200 | 1.43405600  | -1.26158100 |

## TS6

E (B3LYP-CPCM/BS1) = -1904.999318au

H(B3LYP-CPCM/BS1) = -1904.684488au

G(B3LYP-CPCM/BS1) = -1904.774395au

E(B3LYP-D3-CPCM/BS2//B3LYP/BS1) = -1905.964959au

|    |             |             |             |
|----|-------------|-------------|-------------|
| Au | -0.34647700 | -1.35402000 | 0.00319800  |
| P  | -2.66930300 | -1.37874200 | 0.00931600  |
| C  | -3.37229400 | -3.03387100 | 0.40066300  |
| H  | -3.04152900 | -3.34853700 | 1.39465300  |
| H  | -4.46690500 | -3.00000200 | 0.37837600  |
| H  | -3.01934700 | -3.76546500 | -0.33201100 |
| C  | -3.38516300 | -0.90907100 | -1.61205300 |
| H  | -4.47842900 | -0.97019400 | -1.57674400 |
| H  | -3.07803700 | 0.11892300  | -1.82548200 |
| H  | -3.00709800 | -1.57576000 | -2.39223000 |
| C  | -3.43141600 | -0.22907400 | 1.21848300  |
| H  | -3.12152400 | 0.78657300  | 0.96165300  |
| H  | -4.52317300 | -0.30583800 | 1.17328100  |
| H  | -3.09011100 | -0.47096500 | 2.22893100  |
| O  | -0.52629200 | 3.81481400  | -1.64097300 |
| S  | -0.81042800 | 2.52399300  | -0.98954600 |
| O  | -2.24096800 | 2.12935300  | -0.92853400 |
| O  | 0.11661800  | 1.41452200  | -1.34892200 |
| C  | -0.39572400 | 2.83481800  | 0.79725200  |
| F  | -0.72425400 | 1.76667400  | 1.56371600  |
| F  | 0.92432800  | 3.05044900  | 0.95527400  |
| F  | -1.05452100 | 3.89725100  | 1.27656500  |
| C  | 1.91298600  | -1.42768600 | -0.06893800 |
| H  | 1.84613400  | -2.25241800 | 0.64919900  |
| H  | 1.74723200  | -1.61341400 | -1.13548000 |
| C  | 2.36165500  | -0.06040400 | 0.39099600  |
| C  | 2.28710500  | 0.17472200  | 1.88997500  |
| H  | 2.77515400  | -0.63424600 | 2.44533500  |
| H  | 2.76011200  | 1.12457700  | 2.15210500  |
| H  | 1.23722600  | 0.22316100  | 2.19074700  |
| H  | 1.86914700  | 0.73409600  | -0.16658600 |
| O  | 3.83689800  | 0.26718800  | 0.03486900  |
| C  | 4.69703200  | -0.63006400 | -0.32277200 |



|   |            |             |             |
|---|------------|-------------|-------------|
| C | 6.06129300 | -0.12592700 | -0.68069500 |
| H | 6.07904600 | 0.09546700  | -1.75464400 |
| H | 6.28787000 | 0.79145600  | -0.13480200 |
| H | 6.80524900 | -0.89794500 | -0.47561200 |
| O | 4.42395000 | -1.85993500 | -0.40590900 |
| H | 3.19258400 | -1.89220400 | -0.26201800 |

7

E (B3LYP-CPCM/BS1) = -825.114633au

H(B3LYP-CPCM/BS1) = -824.933783au

G(B3LYP-CPCM/BS1) = -824.990172au

E(B3LYP-D3-CPCM/BS2//B3LYP/BS1) = -825.651361au

|    |             |             |             |
|----|-------------|-------------|-------------|
| Au | 0.14933800  | -0.25193200 | -0.00026000 |
| P  | -2.09031500 | 0.16481900  | -0.00018800 |
| C  | -2.96234500 | -0.37990800 | 1.52348900  |
| H  | -2.51469900 | 0.11130100  | 2.39214600  |
| H  | -4.02676000 | -0.12721400 | 1.47104300  |
| H  | -2.85121900 | -1.46148600 | 1.64152000  |
| C  | -3.01396300 | -0.62448500 | -1.37947200 |
| H  | -4.07823800 | -0.37133000 | -1.32724500 |
| H  | -2.60506800 | -0.27991200 | -2.33359300 |
| H  | -2.89606200 | -1.71037400 | -1.32392600 |
| C  | -2.47178000 | 1.95697100  | -0.14228300 |
| H  | -2.04967100 | 2.34556600  | -1.07334300 |
| H  | -3.55374500 | 2.12634400  | -0.13315600 |
| H  | -2.01197000 | 2.49199000  | 0.69345500  |
| O  | 2.17959400  | -0.69320600 | 0.00204900  |
| C  | 2.95906100  | 0.35878500  | 0.00003900  |
| C  | 4.44204000  | 0.00580800  | 0.00142100  |
| H  | 5.05017800  | 0.91239600  | 0.00292200  |
| H  | 4.68198400  | -0.59947500 | 0.88228400  |
| O  | 2.57171900  | 1.52906700  | -0.00297700 |
| H  | 4.68374400  | -0.59735500 | -0.88046100 |

7'

E (B3LYP-CPCM/BS1) = -903.487446au

H(B3LYP-CPCM/BS1) = -903.261907au

G(B3LYP-CPCM/BS1) = -903.324881au

E(B3LYP-D3-CPCM/BS2//B3LYP/BS1) = -904.051071au

|    |            |             |             |
|----|------------|-------------|-------------|
| Au | 0.47020400 | -0.34064300 | 0.00059000  |
| P  | 2.64536600 | 0.34522100  | -0.00007600 |
| C  | 3.03364200 | 1.58324700  | -1.30174600 |
| H  | 2.40438900 | 2.46696300  | -1.16256300 |
| H  | 4.08783100 | 1.87648700  | -1.25609700 |
| H  | 2.81759400 | 1.15635500  | -2.28524000 |
| C  | 3.84895800 | -1.01769900 | -0.27475900 |
| H  | 4.87580100 | -0.63679800 | -0.26633400 |
| H  | 3.73426800 | -1.76885000 | 0.51197500  |
| H  | 3.64612100 | -1.49243000 | -1.23898800 |
| C  | 3.18041500 | 1.13403900  | 1.57170800  |

|   |             |             |             |
|---|-------------|-------------|-------------|
| H | 3.05159800  | 0.42666000  | 2.39583600  |
| H | 4.23060700  | 1.43937000  | 1.51490100  |
| H | 2.55731500  | 2.01107200  | 1.76846000  |
| O | -1.41966300 | -1.09961900 | 0.00127800  |
| C | -2.54252700 | -0.37516600 | 0.00050500  |
| C | -3.77967100 | -1.06105100 | -0.00069900 |
| C | -2.58146400 | 1.03721000  | 0.00106000  |
| C | -4.98683300 | -0.36578600 | -0.00134000 |
| H | -3.76258300 | -2.14784300 | -0.00105100 |
| C | -3.79599700 | 1.72386700  | 0.00026300  |
| H | -1.64133600 | 1.58657500  | 0.00196100  |
| C | -5.01090100 | 1.03331900  | -0.00088400 |
| H | -5.92074300 | -0.92417700 | -0.00228200 |
| H | -3.78947800 | 2.81209300  | 0.00051400  |
| H | -5.95440100 | 1.57205600  | -0.00145300 |

### TS7

E (B3LYP-CPCM/BS1) = -1905.019029au

H(B3LYP-CPCM/BS1) = -1904.704747au

G(B3LYP-CPCM/BS1) = -1904.796553au

E(B3LYP-D3-CPCM/BS2//B3LYP/BS1) = -1905.984047au

|    |             |             |             |
|----|-------------|-------------|-------------|
| Au | 1.64611800  | -0.77396400 | -0.10862600 |
| P  | 2.62407600  | 1.20367200  | 0.44156700  |
| C  | 2.40209900  | 2.49270900  | -0.84358100 |
| H  | 1.32968200  | 2.65763000  | -0.99065400 |
| H  | 2.87729200  | 3.42787000  | -0.52722700 |
| H  | 2.84918500  | 2.15769800  | -1.78382400 |
| C  | 4.43050300  | 1.12439100  | 0.76831700  |
| H  | 4.81189600  | 2.11132000  | 1.05107600  |
| H  | 4.62528700  | 0.41444000  | 1.57718600  |
| H  | 4.94994200  | 0.77999900  | -0.13046800 |
| C  | 1.87000500  | 1.90767800  | 1.95867400  |
| H  | 2.06033600  | 1.24088900  | 2.80469700  |
| H  | 2.28547300  | 2.89815900  | 2.17299500  |
| H  | 0.78980800  | 1.98033600  | 1.80172700  |
| O  | 0.62947700  | -2.53724900 | -0.71215800 |
| C  | -0.50080600 | -2.70654100 | -0.13285200 |
| O  | -3.37611000 | 2.29343200  | -0.09505100 |
| S  | -1.97153200 | 1.85541900  | -0.25663600 |
| O  | -1.01160700 | 2.86804000  | -0.73769000 |
| O  | -1.47308500 | 1.02573800  | 0.88580300  |
| C  | -2.07146200 | 0.62929800  | -1.65264400 |
| F  | -0.85363900 | 0.17905600  | -1.99853800 |
| F  | -2.81830700 | -0.43635000 | -1.28809000 |
| F  | -2.63499400 | 1.18289600  | -2.73262000 |
| C  | -3.40077500 | -1.54625200 | 1.68209500  |
| C  | -3.43680300 | -0.17660600 | 2.01338100  |
| H  | -3.41620200 | -2.22985400 | 2.53615500  |
| H  | -2.28021300 | -1.72502000 | 1.27366200  |
| H  | -3.82083200 | 0.54251900  | 1.29321200  |
| C  | -3.07293200 | 0.35208400  | 3.34041500  |

|   |             |             |             |
|---|-------------|-------------|-------------|
| H | -2.52969500 | 1.29487100  | 3.24460300  |
| H | -4.02205500 | 0.58060500  | 3.85544200  |
| H | -2.51769600 | -0.36657000 | 3.94846200  |
| O | -0.83236700 | -2.08258100 | 0.91008800  |
| C | -1.45722000 | -3.68637100 | -0.78326400 |
| H | -2.18589800 | -3.11178700 | -1.36782200 |
| H | -0.93070600 | -4.36519700 | -1.45608500 |
| H | -2.00258900 | -4.25325000 | -0.02399600 |
| H | -4.03661000 | -1.84509300 | 0.84703000  |

### TS7'

E (B3LYP-CPCM/BS1) = -1983.395259au

H(B3LYP-CPCM/BS1) = -1983.037634au

G(B3LYP-CPCM/BS1) = -1983.133613au

E(B3LYP-D3-CPCM/BS2//B3LYP/BS1) = -1984.390142au

|    |             |             |             |
|----|-------------|-------------|-------------|
| Au | -0.14062400 | -1.27756300 | 0.44375700  |
| P  | 1.69902800  | -2.52534700 | -0.04741500 |
| C  | 2.35836500  | -2.18070200 | -1.72441900 |
| H  | 2.61311200  | -1.11932300 | -1.77906200 |
| H  | 3.25049000  | -2.78673000 | -1.91550100 |
| H  | 1.59511000  | -2.40798000 | -2.47392300 |
| C  | 1.41367100  | -4.34071700 | 0.00403500  |
| H  | 2.33396100  | -4.87949700 | -0.24573500 |
| H  | 1.08491600  | -4.63173500 | 1.00581300  |
| H  | 0.63117700  | -4.61007600 | -0.71104000 |
| C  | 3.10282900  | -2.21472100 | 1.09132600  |
| H  | 2.80183200  | -2.43291700 | 2.11980900  |
| H  | 3.95803200  | -2.84341200 | 0.82042100  |
| H  | 3.37833700  | -1.15966500 | 1.00869000  |
| O  | 2.61287100  | 3.26827400  | 0.30271900  |
| S  | 2.11056000  | 1.91905600  | -0.01882600 |
| O  | 3.12499300  | 0.87557200  | -0.28324800 |
| O  | 0.98791000  | 1.46110600  | 0.86135100  |
| C  | 1.26754000  | 2.13803300  | -1.66249200 |
| F  | 0.77759300  | 0.96451100  | -2.11346700 |
| F  | 0.23736800  | 2.99843300  | -1.55204000 |
| F  | 2.11790500  | 2.61326100  | -2.57901900 |
| C  | -1.80642900 | 2.32631500  | 1.94599500  |
| C  | -0.61827300 | 3.06157500  | 1.80378700  |
| H  | -2.12534900 | 2.13084000  | 2.97245900  |
| H  | -1.62047800 | 1.20287100  | 1.48166700  |
| H  | -0.41322500 | 3.52641300  | 0.84396000  |
| C  | 0.30354600  | 3.38793100  | 2.91159900  |
| H  | 1.32996700  | 3.49996900  | 2.55890900  |
| H  | -0.02238900 | 4.36600100  | 3.30678400  |
| H  | 0.23955400  | 2.66475700  | 3.72949300  |
| O  | -1.85907900 | -0.14824500 | 0.93987000  |
| H  | -2.61510600 | 2.62461700  | 1.27037300  |
| C  | -2.92184800 | -0.10412600 | 0.08695200  |
| C  | -4.21598500 | -0.29273300 | 0.60174400  |
| C  | -2.76380900 | 0.17751800  | -1.28207300 |

|   |             |             |             |
|---|-------------|-------------|-------------|
| C | -5.32573900 | -0.22277400 | -0.24158700 |
| H | -4.33025200 | -0.50327600 | 1.66155500  |
| C | -3.87969900 | 0.24108900  | -2.11748400 |
| H | -1.76461100 | 0.34873100  | -1.67330900 |
| C | -5.16509700 | 0.04106200  | -1.60488800 |
| H | -6.32038400 | -0.37817800 | 0.16899500  |
| H | -3.74308200 | 0.45364300  | -3.17494000 |
| H | -6.03050100 | 0.09169700  | -2.25961200 |

## 8

E (B3LYP-CPCM/BS1) = -1787.145941au

H(B3LYP-CPCM/BS1) = -1786.915151au

G(B3LYP-CPCM/BS1) = -1786.997596au

E(B3LYP-D3-CPCM/BS2//B3LYP/BS1) = -1788.052267au

|    |             |             |             |
|----|-------------|-------------|-------------|
| Au | -2.14247600 | 0.53339500  | 0.03175400  |
| P  | -3.85700700 | -0.95720200 | 0.10677800  |
| C  | -5.37745900 | -0.37226400 | -0.73747800 |
| H  | -5.15468000 | -0.16145100 | -1.78708100 |
| H  | -6.16152900 | -1.13436500 | -0.67808500 |
| H  | -5.72798900 | 0.54835400  | -0.26274500 |
| C  | -4.36952900 | -1.37436100 | 1.81850000  |
| H  | -5.18862700 | -2.10102100 | 1.80407000  |
| H  | -3.51839800 | -1.79640400 | 2.36003900  |
| H  | -4.69705800 | -0.46737800 | 2.33410700  |
| C  | -3.42990200 | -2.55545500 | -0.68568600 |
| H  | -2.56057900 | -2.98912200 | -0.18372500 |
| H  | -4.27385000 | -3.25022000 | -0.62082500 |
| H  | -3.17647200 | -2.38668800 | -1.73591900 |
| O  | 0.78979700  | 0.42877500  | -0.77827600 |
| H  | 1.79925200  | 0.21444500  | -0.98734900 |
| C  | 0.57874300  | 1.62831000  | -0.34182300 |
| O  | 2.96014700  | -1.66998600 | 0.59002800  |
| S  | 3.86744100  | -1.09401500 | -0.41704700 |
| O  | 4.72749400  | -2.01118500 | -1.17417000 |
| O  | 3.19600700  | -0.04646900 | -1.28671700 |
| C  | 5.04611500  | -0.04797700 | 0.56423300  |
| F  | 5.89461700  | 0.60272700  | -0.24102300 |
| F  | 4.36968400  | 0.86619800  | 1.29068100  |
| F  | 5.75270900  | -0.80853500 | 1.40934400  |
| O  | -0.57483500 | 1.97307800  | 0.01719000  |
| C  | 1.71073300  | 2.61595100  | -0.27514800 |
| H  | 1.36727400  | 3.55361200  | 0.16066000  |
| H  | 2.53292500  | 2.19904300  | 0.31298000  |
| H  | 2.09722000  | 2.79279900  | -1.28462300 |

## TS8

E (B3LYP-CPCM/BS1) = -3463.080661au

H(B3LYP-CPCM/BS1) = -3462.603097au

G(B3LYP-CPCM/BS1) = -3462.743820au

E(B3LYP-D3-CPCM/BS2//B3LYP/BS1) = -3464.8647658au

|    |             |             |             |
|----|-------------|-------------|-------------|
| Au | -2.39888900 | -0.97283000 | -1.13512000 |
| P  | -4.05648600 | -1.76546400 | 0.21059600  |
| C  | -4.39777100 | -3.55793900 | -0.00538300 |
| H  | -3.50193900 | -4.13700300 | 0.23572600  |
| H  | -5.21648000 | -3.86753500 | 0.65292300  |
| H  | -4.67447100 | -3.75777700 | -1.04446200 |
| C  | -5.64188800 | -0.90692600 | -0.11682200 |
| H  | -6.42661900 | -1.30162100 | 0.53759000  |
| H  | -5.49005400 | 0.15738600  | 0.08249600  |
| H  | -5.93242200 | -1.04753700 | -1.16167100 |
| C  | -3.73074000 | -1.52334600 | 1.99574100  |
| H  | -3.57371600 | -0.45556200 | 2.16797600  |
| H  | -4.58528500 | -1.87689200 | 2.58269900  |
| H  | -2.83474800 | -2.07606000 | 2.28815300  |
| O  | 0.47435100  | 0.84680900  | -1.22879300 |
| C  | -0.27107100 | 0.86287800  | -2.29151000 |
| Au | 0.82124400  | -0.88150400 | 0.05964700  |
| P  | 1.39773600  | -2.62872200 | 1.40523500  |
| C  | 2.43470800  | -3.86371500 | 0.53838300  |
| H  | 3.33943500  | -3.35719500 | 0.19103400  |
| H  | 2.69814900  | -4.67787100 | 1.22228900  |
| H  | 1.88772000  | -4.26815400 | -0.31813900 |
| C  | 2.34891000  | -2.09200400 | 2.87624600  |
| H  | 2.65934800  | -2.96506500 | 3.46040100  |
| H  | 3.22423500  | -1.52643100 | 2.54726600  |
| H  | 1.72116100  | -1.44300400 | 3.49382800  |
| C  | -0.03935200 | -3.56114300 | 2.06797900  |
| H  | 0.30634300  | -4.41136600 | 2.66563000  |
| H  | -0.64121200 | -2.90095800 | 2.69842600  |
| H  | -0.65607600 | -3.92616300 | 1.24207300  |
| O  | -3.93515500 | 1.67639200  | 1.03526600  |
| S  | -2.58118500 | 2.22757800  | 0.77855100  |
| O  | -1.50396900 | 1.63203900  | 1.60937700  |
| O  | -2.23904300 | 2.40879100  | -0.65537900 |
| C  | -2.69338300 | 3.97422600  | 1.40571700  |
| F  | -1.52353600 | 4.61516000  | 1.21741700  |
| F  | -3.65104300 | 4.65355700  | 0.75780700  |
| F  | -2.97329000 | 3.99310400  | 2.71703700  |
| C  | -0.13815200 | 2.04105700  | -3.21749400 |
| H  | -0.51615200 | 1.78268800  | -4.20751300 |
| H  | -0.75799900 | 2.84529200  | -2.80387300 |
| O  | -1.07850500 | -0.05328100 | -2.56971100 |
| H  | 0.89666000  | 2.38467300  | -3.28161200 |
| H  | 0.95759200  | 2.01412200  | -0.68448800 |
| O  | 3.71804600  | 0.36422800  | -1.07983800 |
| S  | 4.49970800  | -0.10628700 | 0.09375300  |
| O  | 4.10756800  | 0.53563300  | 1.37688600  |
| O  | 4.71486300  | -1.56899500 | 0.17066200  |
| C  | 6.20098300  | 0.57097300  | -0.22840700 |
| F  | 7.03348200  | 0.26827400  | 0.77736400  |
| F  | 6.70567500  | 0.06916300  | -1.36411000 |
| F  | 6.15464500  | 1.91307400  | -0.34560300 |

|   |            |            |             |
|---|------------|------------|-------------|
| C | 1.10022700 | 3.09631400 | 0.04816600  |
| C | 2.47459800 | 3.00088500 | 0.04631300  |
| H | 0.61624100 | 3.87229200 | -0.54484700 |
| H | 0.52866900 | 2.72569100 | 0.90084300  |
| H | 2.95188800 | 2.30083100 | 0.73533700  |
| C | 3.37653700 | 3.69755700 | -0.89629000 |
| H | 4.08492300 | 4.29913400 | -0.30762200 |
| H | 3.98494400 | 2.95552800 | -1.42583600 |
| H | 2.84842100 | 4.34626100 | -1.59935900 |

### TS8'

E (B3LYP-CPCM/BS1) = -3541.456813au

H(B3LYP-CPCM/BS1) = -3540.934946au

G(B3LYP-CPCM/BS1) = -3541.078225au

E(B3LYP-D3-CPCM/BS2//B3LYP/BS1) = -3543.262930au

|    |             |             |             |
|----|-------------|-------------|-------------|
| Au | -0.04083300 | 0.91768300  | 1.53127700  |
| P  | -0.68099200 | -0.26812000 | 3.36606200  |
| C  | -2.26174100 | 0.31834000  | 4.08200900  |
| H  | -3.02350300 | 0.27305100  | 3.29947400  |
| H  | -2.54955200 | -0.31632100 | 4.92721500  |
| H  | -2.15249100 | 1.35138400  | 4.42475600  |
| C  | 0.55738100  | -0.23078300 | 4.71818000  |
| H  | 0.20992500  | -0.83657800 | 5.56215100  |
| H  | 1.49756800  | -0.63565700 | 4.33424700  |
| H  | 0.71391200  | 0.79899300  | 5.05197200  |
| C  | -0.92182300 | -2.03852300 | 2.96721800  |
| H  | 0.02408800  | -2.44024800 | 2.59432500  |
| H  | -1.22637600 | -2.58434800 | 3.86714700  |
| H  | -1.69542400 | -2.12942000 | 2.20132200  |
| O  | 0.51591400  | 2.01922100  | -0.33827500 |
| H  | 1.84643100  | 2.40504300  | -0.23246500 |
| C  | -0.23653800 | 3.14459200  | -0.69090700 |
| C  | -0.45246400 | 3.44250400  | -2.03962500 |
| C  | -0.71903300 | 3.99698400  | 0.30630000  |
| C  | -1.17436700 | 4.58649300  | -2.38628500 |
| H  | -0.06897500 | 2.77449500  | -2.80611300 |
| C  | -1.43868600 | 5.13878600  | -0.05132000 |
| H  | -0.54223400 | 3.75655200  | 1.35096200  |
| C  | -1.66960400 | 5.43773100  | -1.39596600 |
| H  | -1.35059000 | 4.80741100  | -3.43516900 |
| H  | -1.82191500 | 5.79198700  | 0.72739700  |
| H  | -2.23501000 | 6.32345400  | -1.66955400 |
| O  | 2.53514600  | -0.15264200 | 0.33950700  |
| S  | 3.29775800  | -1.06609900 | 1.24536100  |
| O  | 4.59385700  | -0.50889800 | 1.68704300  |
| O  | 2.48268900  | -1.73224700 | 2.28264100  |
| C  | 3.76101000  | -2.44796500 | 0.08903900  |
| F  | 4.52879000  | -3.35587300 | 0.69808100  |
| F  | 2.65724900  | -3.06920300 | -0.37482500 |
| F  | 4.43324500  | -1.96821800 | -0.97713700 |
| C  | 2.93197700  | 3.10011900  | -0.17163500 |

|    |             |             |             |
|----|-------------|-------------|-------------|
| C  | 3.88860100  | 2.10166900  | -0.27956900 |
| H  | 2.77128000  | 3.74578400  | -1.03841900 |
| H  | 2.80651800  | 3.57712900  | 0.80155000  |
| H  | 4.26162900  | 1.61962700  | 0.62146100  |
| C  | 4.44502100  | 1.60718800  | -1.55679100 |
| H  | 5.51571300  | 1.86472500  | -1.57733400 |
| H  | 4.39365800  | 0.51429100  | -1.58754000 |
| H  | 3.95870300  | 2.04331900  | -2.43304600 |
| Au | 0.32103200  | 0.18858500  | -1.60129000 |
| P  | 0.00589200  | -1.70632800 | -2.82172800 |
| C  | 1.51882400  | -2.27372800 | -3.69643200 |
| H  | 2.31151800  | -2.45373600 | -2.96547200 |
| H  | 1.31304900  | -3.19988800 | -4.24376200 |
| H  | 1.85190000  | -1.50535300 | -4.39987700 |
| C  | -1.29600300 | -1.52314200 | -4.09658900 |
| H  | -1.01420400 | -0.74094800 | -4.80719900 |
| H  | -1.43681300 | -2.46853000 | -4.63165300 |
| H  | -2.22061700 | -1.23736700 | -3.58827000 |
| C  | -0.51093400 | -3.11862000 | -1.77621500 |
| H  | -0.66447300 | -4.00595600 | -2.40033200 |
| H  | 0.26443000  | -3.32543100 | -1.03472500 |
| H  | -1.44061000 | -2.85676600 | -1.26730400 |
| O  | -5.07668200 | 0.19450000  | -0.61544700 |
| S  | -3.83703500 | -0.52077800 | -0.26459200 |
| O  | -2.85897100 | -0.68560800 | -1.37487000 |
| O  | -3.22392900 | -0.14422100 | 1.03624400  |
| C  | -4.39322000 | -2.26681900 | 0.04353600  |
| F  | -3.33812300 | -3.04552100 | 0.38510100  |
| F  | -5.28311600 | -2.32468800 | 1.04434400  |
| F  | -4.95281000 | -2.79971400 | -1.05295000 |

## 9

E (B3LYP-CPCM/BS1) = -3345.206689au

H(B3LYP-CPCM/BS1) = -3344.811061au

G(B3LYP-CPCM/BS1) = -3344.941796au

E(B3LYP-D3-CPCM/BS2//B3LYP/BS1) = -3346.922370au

|    |             |             |             |
|----|-------------|-------------|-------------|
| Au | 2.08413400  | -1.80998800 | 0.02062900  |
| P  | 4.26090900  | -1.17715500 | -0.22157400 |
| C  | 5.30540500  | -2.50542400 | -0.94493600 |
| H  | 4.93016700  | -2.76814600 | -1.93805000 |
| H  | 6.34418600  | -2.16807200 | -1.02708400 |
| H  | 5.26280700  | -3.39395800 | -0.30873800 |
| C  | 5.03635200  | -0.76344500 | 1.38786900  |
| H  | 6.09361800  | -0.51826400 | 1.23883000  |
| H  | 4.51952200  | 0.09444600  | 1.83016500  |
| H  | 4.95359500  | -1.61894900 | 2.06422800  |
| C  | 4.53227800  | 0.28987700  | -1.28403500 |
| H  | 3.95283000  | 1.12668900  | -0.88280100 |
| H  | 5.59713000  | 0.54583000  | -1.30152600 |
| H  | 4.19477900  | 0.07377000  | -2.30169200 |
| O  | -1.35528300 | -1.13949600 | 0.57173400  |

|    |             |             |             |
|----|-------------|-------------|-------------|
| C  | -0.90525400 | -2.32151600 | 0.79470900  |
| Au | -0.62198200 | 0.34736000  | -0.81314200 |
| P  | -0.25487700 | 1.93642900  | -2.39934400 |
| C  | 1.39933400  | 1.85962900  | -3.18424100 |
| H  | 1.55095500  | 0.87309200  | -3.63128600 |
| H  | 1.48763600  | 2.62887900  | -3.95886900 |
| H  | 2.14835300  | 2.02588000  | -2.40732300 |
| C  | -1.46331200 | 1.79838700  | -3.77716700 |
| H  | -1.29212700 | 2.58590900  | -4.51885000 |
| H  | -1.36342200 | 0.82015800  | -4.25618100 |
| H  | -2.47754400 | 1.88712000  | -3.37755700 |
| C  | -0.41798000 | 3.65613000  | -1.78538800 |
| H  | -0.26010500 | 4.36085800  | -2.60901300 |
| H  | -1.41650100 | 3.80580400  | -1.36584000 |
| H  | 0.32755600  | 3.82211800  | -1.00534600 |
| O  | 3.18082100  | 2.04072200  | 2.30577400  |
| S  | 1.96553800  | 1.89457100  | 1.47602900  |
| O  | 2.13019300  | 2.31316100  | 0.05600400  |
| O  | 1.22518400  | 0.61803400  | 1.66367600  |
| C  | 0.78168000  | 3.15944200  | 2.15193000  |
| F  | -0.40725200 | 3.06702300  | 1.52196700  |
| F  | 0.57703400  | 2.97117500  | 3.46118200  |
| F  | 1.25301300  | 4.40206200  | 1.96583900  |
| C  | -1.79779700 | -3.24777200 | 1.59160200  |
| H  | -1.42887500 | -4.27236900 | 1.53848600  |
| H  | -1.79482800 | -2.92210700 | 2.63858400  |
| O  | 0.20900600  | -2.75658900 | 0.41014500  |
| H  | -2.82724900 | -3.19597600 | 1.22956700  |
| H  | -2.73194500 | -0.63306600 | 1.10957900  |
| O  | -3.60003600 | -0.27071000 | 1.52255300  |
| S  | -4.67370400 | 0.17176500  | 0.44136000  |
| O  | -5.54785800 | 1.16500200  | 1.04253800  |
| O  | -4.05646100 | 0.38592300  | -0.86577200 |
| C  | -5.66296800 | -1.40055400 | 0.29617400  |
| F  | -6.61184100 | -1.22967100 | -0.62272000 |
| F  | -4.85534600 | -2.40015900 | -0.08560300 |
| F  | -6.21908500 | -1.70591800 | 1.46516900  |

9'

E (B3LYP-CPCM/BS1) = -3423.583798au

H(B3LYP-CPCM/BS1) = -3423.144617au

G(B3LYP-CPCM/BS1) = -3423.276163au

E(B3LYP-D3-CPCM/BS2//B3LYP/BS1) = -3425.327122au

|    |             |            |             |
|----|-------------|------------|-------------|
| Au | 0.57361200  | 1.36817500 | -0.28976800 |
| P  | 0.25936900  | 3.41542100 | 0.65030800  |
| C  | 1.72011900  | 4.51003700 | 0.43785100  |
| H  | 1.89578800  | 4.68492000 | -0.62755000 |
| H  | 1.55430400  | 5.46917400 | 0.93984800  |
| H  | 2.60339600  | 4.02430300 | 0.86150600  |
| C  | -0.03379000 | 3.32589100 | 2.45620500  |
| H  | -0.17023400 | 4.33287100 | 2.86526800  |



|    |             |             |             |
|----|-------------|-------------|-------------|
| H  | -0.93237100 | 2.72746900  | 2.62303900  |
| H  | 0.82044400  | 2.84668400  | 2.94277400  |
| C  | -1.15872000 | 4.33636000  | -0.05476900 |
| H  | -2.06564300 | 3.74772500  | 0.10051600  |
| H  | -1.25587500 | 5.30948000  | 0.43868000  |
| H  | -1.00231100 | 4.48671100  | -1.12682700 |
| O  | 0.97756800  | -0.59751000 | -1.15249300 |
| H  | 2.35119000  | -0.93226300 | -0.63862700 |
| C  | 0.83215800  | -0.69279000 | -2.54502100 |
| C  | -0.40551100 | -0.42541100 | -3.13945400 |
| C  | 1.93618100  | -1.05232400 | -3.32274200 |
| C  | -0.52972100 | -0.52196100 | -4.52680200 |
| H  | -1.24983900 | -0.14728400 | -2.51487900 |
| C  | 1.79452400  | -1.14425600 | -4.71058400 |
| H  | 2.89297700  | -1.25783100 | -2.85318100 |
| C  | 0.56564400  | -0.88041800 | -5.31815700 |
| H  | -1.49142000 | -0.31440200 | -4.98827100 |
| H  | 2.65395400  | -1.42413700 | -5.31377400 |
| H  | 0.46170700  | -0.95324500 | -6.39684600 |
| O  | 2.46831200  | -0.52298600 | 1.91557000  |
| S  | 3.66670900  | -0.88176500 | 1.15760300  |
| O  | 4.61026100  | -1.86845100 | 1.65950400  |
| O  | 3.31214100  | -1.22722300 | -0.34387100 |
| C  | 4.63288200  | 0.69693100  | 0.91759200  |
| F  | 5.76735100  | 0.44379000  | 0.27028600  |
| F  | 3.90986800  | 1.57621800  | 0.21086300  |
| F  | 4.90464800  | 1.21837900  | 2.11441200  |
| Au | -0.29788700 | -1.91327900 | 0.03055000  |
| P  | -1.55417300 | -3.33357900 | 1.28953700  |
| C  | -3.19383100 | -3.68184500 | 0.55136900  |
| H  | -3.06774700 | -4.09429600 | -0.45358600 |
| H  | -3.74024200 | -4.39779700 | 1.17495300  |
| H  | -3.74490000 | -2.73882700 | 0.49706200  |
| C  | -0.74606600 | -4.96649100 | 1.52468800  |
| H  | -1.37718100 | -5.61472500 | 2.14201800  |
| H  | -0.58448600 | -5.43917600 | 0.55170200  |
| H  | 0.22253500  | -4.83159500 | 2.01413700  |
| C  | -1.88810800 | -2.68877500 | 2.97129100  |
| H  | -2.45686400 | -3.42601300 | 3.54821400  |
| H  | -0.94403800 | -2.47569800 | 3.48019200  |
| H  | -2.46961100 | -1.76815600 | 2.87258300  |
| O  | -2.60635600 | 0.36946800  | -0.76748400 |
| S  | -3.27796700 | 0.67109700  | 0.52197700  |
| O  | -3.80750400 | -0.51305200 | 1.24245700  |
| O  | -2.57347100 | 1.65713800  | 1.37856600  |
| C  | -4.80428200 | 1.59115100  | -0.00580700 |
| F  | -5.55218600 | 1.92436400  | 1.05594400  |
| F  | -4.46429600 | 2.72317200  | -0.65168500 |
| F  | -5.54984800 | 0.84483100  | -0.83356200 |

TS9

E (B3LYP-CPCM/BS1) = -3463.086544au

H(B3LYP-CPCM/BS1) = -3462.603409au

G(B3LYP-CPCM/BS1) = -3462.743724au

E(B3LYP-D3-CPCM/BS2//B3LYP/BS1) = -3464.862341au

|    |             |             |             |
|----|-------------|-------------|-------------|
| Au | -0.04078700 | -1.44697200 | -0.45436800 |
| P  | 1.27808000  | -3.21921600 | -1.05438800 |
| C  | 0.40163300  | -4.31698300 | -2.23980600 |
| H  | 0.14765900  | -3.75860700 | -3.14508400 |
| H  | 1.04146700  | -5.16512100 | -2.50579900 |
| H  | -0.52067500 | -4.69008400 | -1.78575900 |
| C  | 1.72341300  | -4.27753000 | 0.37080600  |
| H  | 2.27465100  | -5.15633000 | 0.01861800  |
| H  | 2.35211400  | -3.69699500 | 1.05292000  |
| H  | 0.81474900  | -4.60000800 | 0.88697700  |
| C  | 2.84957300  | -2.76784800 | -1.87611200 |
| H  | 3.44075600  | -2.13335300 | -1.20978200 |
| H  | 3.41184300  | -3.67579200 | -2.11967800 |
| H  | 2.63181100  | -2.21937800 | -2.79687800 |
| O  | -0.31061500 | 1.55130000  | 1.05516700  |
| C  | -1.39414000 | 0.93304800  | 0.97346000  |
| Au | 1.33692300  | 1.71268300  | -0.31889200 |
| P  | 3.01260700  | 2.34982000  | -1.72640900 |
| C  | 2.49689000  | 3.71363300  | -2.84631500 |
| H  | 2.15177500  | 4.56455800  | -2.25230300 |
| H  | 3.33534900  | 4.02831600  | -3.47691600 |
| H  | 1.67342000  | 3.37560600  | -3.48183200 |
| C  | 4.45920100  | 2.99557600  | -0.80363800 |
| H  | 5.25177800  | 3.29118700  | -1.49940500 |
| H  | 4.15488600  | 3.86264700  | -0.21026600 |
| H  | 4.82276600  | 2.21204800  | -0.13513800 |
| C  | 3.67217500  | 1.04507100  | -2.83032700 |
| H  | 4.46712800  | 1.45773500  | -3.46076100 |
| H  | 4.07011200  | 0.24292000  | -2.20564000 |
| H  | 2.87075300  | 0.65766200  | -3.46579800 |
| O  | 3.78423900  | -2.12184500 | 1.70296400  |
| S  | 3.74463500  | -0.67159900 | 1.40899700  |
| O  | 4.28133300  | -0.29996900 | 0.07107600  |
| O  | 2.47748200  | 0.01043200  | 1.77875800  |
| C  | 4.99525800  | 0.06065200  | 2.57276900  |
| F  | 5.09934600  | 1.38819300  | 2.36802400  |
| F  | 4.63806000  | -0.14111200 | 3.84738700  |
| F  | 6.20191100  | -0.48837400 | 2.37453400  |
| C  | -2.52409500 | 1.35386400  | 1.88213800  |
| H  | -3.28415700 | 1.90516900  | 1.31553300  |
| H  | -3.01342900 | 0.48120600  | 2.32294800  |
| O  | -1.59831300 | -0.05163100 | 0.14688300  |
| H  | -2.13424900 | 2.00073200  | 2.66862300  |
| H  | -4.11112800 | -0.75923400 | -2.55416500 |
| O  | -5.85242000 | -0.31454400 | -0.88174100 |
| S  | -6.45732800 | 0.91041500  | -0.24586900 |
| O  | -5.43582600 | 1.91300000  | 0.14134600  |

|   |             |             |             |
|---|-------------|-------------|-------------|
| O | -7.66196100 | 1.40926600  | -0.91990500 |
| C | -7.05879300 | 0.25580600  | 1.38496400  |
| F | -7.61531700 | 1.23359900  | 2.10916800  |
| F | -7.96239900 | -0.71581500 | 1.20781200  |
| F | -6.02580000 | -0.25369300 | 2.08974100  |
| C | -3.20374100 | -0.49982900 | -1.99636700 |
| C | -3.56243400 | -0.52748600 | -0.55471700 |
| H | -2.43909000 | -1.24723600 | -2.23261500 |
| H | -2.87527000 | 0.49127300  | -2.31413900 |
| H | -3.85174300 | 0.39736900  | -0.08618000 |
| C | -3.72372900 | -1.82187400 | 0.16051700  |
| H | -2.79115800 | -2.39590500 | 0.11901900  |
| H | -4.03625700 | -1.68641600 | 1.19604000  |
| H | -4.48863700 | -2.40514000 | -0.36371700 |

## 10

E (B3LYP-CPCM/BS1) = -2383.190453au

H(B3LYP-CPCM/BS1) = -2382.843388au

G(B3LYP-CPCM/BS1) = -2382.94892au

E(B3LYP-D3-CPCM/BS2//B3LYP/BS1) = -2384.535360au

|    |             |             |             |
|----|-------------|-------------|-------------|
| Au | -2.14501100 | 0.25008300  | 0.12930900  |
| P  | -2.72684400 | -1.39340900 | -1.34472100 |
| C  | -4.21532700 | -0.92467000 | -2.31906300 |
| H  | -4.00275100 | -0.02903600 | -2.90972900 |
| H  | -4.50234600 | -1.74131300 | -2.99025600 |
| H  | -5.04481200 | -0.70631500 | -1.64045500 |
| C  | -3.17090300 | -2.95373500 | -0.49295700 |
| H  | -3.51348600 | -3.69504400 | -1.22328300 |
| H  | -2.28163600 | -3.32426300 | 0.02564100  |
| H  | -3.96597700 | -2.76224900 | 0.23328700  |
| C  | -1.46911000 | -1.85686100 | -2.59323200 |
| H  | -0.55320600 | -2.16571000 | -2.08264200 |
| H  | -1.84826000 | -2.67714100 | -3.21223400 |
| H  | -1.25198700 | -0.99398100 | -3.22892900 |
| O  | 0.10417800  | 2.44664900  | 1.75832800  |
| C  | -1.09283800 | 2.37043800  | 2.16306000  |
| Au | 1.08801700  | 1.68521700  | 0.05087400  |
| P  | 2.49866700  | 1.19260500  | -1.67382100 |
| C  | 3.18709900  | 2.72662100  | -2.42240400 |
| H  | 3.69812500  | 3.31297800  | -1.65350100 |
| H  | 3.89610100  | 2.47961300  | -3.22001100 |
| H  | 2.37380900  | 3.32953500  | -2.83661200 |
| C  | 3.96048800  | 0.22952100  | -1.12761800 |
| H  | 4.61919100  | 0.02479000  | -1.97859800 |
| H  | 4.50956900  | 0.79946600  | -0.37246900 |
| H  | 3.61256100  | -0.70860700 | -0.69013800 |
| C  | 1.79255100  | 0.26304800  | -3.08552500 |
| H  | 2.55230000  | 0.13944500  | -3.86478800 |
| H  | 1.46890200  | -0.71378000 | -2.72204900 |
| H  | 0.93774400  | 0.80790300  | -3.49606300 |
| O  | -0.08810900 | -3.43225600 | 0.52227400  |

|   |             |             |             |
|---|-------------|-------------|-------------|
| S | 0.92789700  | -2.35792900 | 0.60787700  |
| O | 1.42543700  | -1.88031400 | -0.71233400 |
| O | 0.64052700  | -1.28481000 | 1.58905500  |
| C | 2.41920500  | -3.21313200 | 1.31536700  |
| F | 3.45380300  | -2.35345700 | 1.40153800  |
| F | 2.16518500  | -3.68695200 | 2.54292400  |
| F | 2.79533600  | -4.23740900 | 0.53410800  |
| C | -1.42526700 | 3.10933400  | 3.44575500  |
| H | -2.42003500 | 3.55632400  | 3.37799600  |
| H | -1.43915500 | 2.38547900  | 4.26908100  |
| O | -2.04874100 | 1.73278100  | 1.62567100  |
| H | -0.67645300 | 3.87276400  | 3.66202200  |

### 10'

E (B3LYP-CPCM/BS1) = -2461.564206au

H(B3LYP-CPCM/BS1) = -2461.173604au

G(B3LYP-CPCM/BS1) = -2461.284029au

E(B3LYP-D3-CPCM/BS2//B3LYP/BS1) = -2462.935499au

|    |             |             |             |
|----|-------------|-------------|-------------|
| Au | 1.35176800  | -1.44519100 | 0.16016100  |
| P  | 0.75370300  | -3.61189700 | 0.52539800  |
| C  | 2.14839600  | -4.63075600 | 1.15552500  |
| H  | 2.52296300  | -4.20386000 | 2.09014500  |
| H  | 1.81531300  | -5.65868400 | 1.33443200  |
| H  | 2.96089500  | -4.63733500 | 0.42338800  |
| C  | 0.15535200  | -4.46883100 | -0.97884200 |
| H  | -0.08636500 | -5.51120800 | -0.74400800 |
| H  | -0.74023700 | -3.94910900 | -1.33016000 |
| H  | 0.92764100  | -4.43876300 | -1.75277600 |
| C  | -0.58045400 | -3.77893300 | 1.77016200  |
| H  | -1.43042800 | -3.16870700 | 1.45521200  |
| H  | -0.88179400 | -4.82820200 | 1.85952200  |
| H  | -0.22058200 | -3.41886400 | 2.73841900  |
| O  | 1.85198400  | 0.59359900  | -0.13197700 |
| C  | 3.11103400  | 1.03482600  | -0.42682700 |
| C  | 3.55669000  | 2.28223800  | 0.03687100  |
| C  | 3.97559700  | 0.24581400  | -1.20191900 |
| C  | 4.84267200  | 2.72788600  | -0.27272500 |
| H  | 2.88975300  | 2.89054800  | 0.64285600  |
| C  | 5.26084700  | 0.69917400  | -1.50205600 |
| H  | 3.62707400  | -0.71535600 | -1.57133800 |
| C  | 5.70429600  | 1.94167900  | -1.04183300 |
| H  | 5.17163800  | 3.69623000  | 0.09590800  |
| H  | 5.91585800  | 0.07574700  | -2.10542900 |
| H  | 6.70461400  | 2.29175100  | -1.27925500 |
| Au | 0.17497200  | 1.85960100  | 0.18357600  |
| P  | -1.69580400 | 3.11535200  | 0.48662100  |
| C  | -2.78501600 | 2.45041000  | 1.80249400  |
| H  | -2.25636000 | 2.48014500  | 2.75978100  |
| H  | -3.70097900 | 3.04707400  | 1.87295700  |
| H  | -3.02741100 | 1.41058200  | 1.56675200  |
| C  | -1.35604200 | 4.85925500  | 0.95790600  |

|   |             |             |             |
|---|-------------|-------------|-------------|
| H | -2.29495600 | 5.40943600  | 1.08094100  |
| H | -0.79692800 | 4.88482800  | 1.89754800  |
| H | -0.75516200 | 5.33948300  | 0.18028800  |
| C | -2.72923000 | 3.20420600  | -1.02401700 |
| H | -3.64256700 | 3.77596100  | -0.82751800 |
| H | -2.16205400 | 3.68610300  | -1.82570300 |
| H | -2.97866100 | 2.18524000  | -1.32934000 |
| O | -2.44928100 | -2.51179600 | -0.94598500 |
| S | -2.62401300 | -1.09882600 | -0.53521300 |
| O | -2.36427100 | -0.83545900 | 0.90437700  |
| O | -2.05650700 | -0.09331200 | -1.46783900 |
| C | -4.45682000 | -0.82310000 | -0.68464100 |
| F | -4.76622200 | 0.44596200  | -0.34034200 |
| F | -4.87464300 | -1.02467300 | -1.94234900 |
| F | -5.13661500 | -1.64789800 | 0.12558700  |

### HOAc

E (B3LYP-CPCM/BS1) = -229.081342au

H(B3LYP-CPCM/BS1) = -229.013919au

G(B3LYP-CPCM/BS1) = -229.046873au

E(B3LYP-D3-CPCM/BS2//B3LYP/BS1) = -229.196236au

|   |             |             |             |
|---|-------------|-------------|-------------|
| O | -0.77921000 | -1.04455400 | -0.00000400 |
| C | -0.09216500 | 0.12363400  | -0.00002900 |
| O | -0.64458800 | 1.20327500  | 0.00000500  |
| C | 1.39704100  | -0.11079000 | -0.00000700 |
| H | 1.91885000  | 0.84637200  | -0.00078800 |
| H | 1.68464700  | -0.69118600 | 0.88283700  |
| H | 1.68453900  | -0.69265400 | -0.88190700 |
| H | -1.72691300 | -0.80936900 | 0.00006200  |

### (HOAc)<sub>2</sub>

E (B3LYP-CPCM/BS1) = -458.191143au

H(B3LYP-CPCM/BS1) = -458.054059au

G(B3LYP-CPCM/BS1) = -458.102017au

E(B3LYP-D3-CPCM/BS2//B3LYP/BS1) = -458.417902au

|   |             |             |             |
|---|-------------|-------------|-------------|
| O | -1.26059600 | 1.08699800  | -0.00002100 |
| O | -1.42469100 | -1.16251900 | 0.00003700  |
| C | 1.93698700  | -0.05791200 | -0.00001100 |
| O | 1.42470000  | 1.16252300  | 0.00003000  |
| O | 1.26060100  | -1.08700500 | -0.00002900 |
| C | 3.44317600  | -0.06921300 | -0.00000800 |
| H | 3.80907200  | -1.09605700 | -0.00028300 |
| H | 3.81660700  | 0.46148900  | -0.88191500 |
| H | 3.81656800  | 0.46096900  | 0.88223300  |
| H | 0.42124700  | 1.11472300  | 0.00000900  |
| H | -0.42123300 | -1.11471100 | 0.00002000  |
| C | -1.93699100 | 0.05790900  | 0.00000300  |
| C | -3.44318900 | 0.06921400  | -0.00001200 |
| H | -3.80907200 | 1.09606400  | 0.00000000  |
| H | -3.81659200 | -0.46121100 | -0.88209700 |

H -3.81660700 -0.46122500 0.88205900

#### HOAc-HOTf

E (B3LYP-CPCM/BS1) = -1191.103968au

H(B3LYP-CPCM/BS1) = -1190.987931au

G(B3LYP-CPCM/BS1) = -1191.045388au

E(B3LYP-D3-CPCM/BS2//B3LYP/BS1) = -1191.583481au

|   |             |             |             |
|---|-------------|-------------|-------------|
| O | 1.94178200  | -1.89463200 | 0.15922200  |
| S | 0.96525300  | -0.83419100 | -0.00078400 |
| O | 0.06275700  | -0.82142900 | -1.16473600 |
| O | 0.14049100  | -0.65533200 | 1.33062100  |
| C | 1.89706900  | 0.77808100  | -0.06327300 |
| F | 1.02531200  | 1.78708200  | -0.06399600 |
| F | 2.69664400  | 0.87472300  | 0.99445700  |
| F | 2.61941400  | 0.80830700  | -1.18108200 |
| C | -3.01557400 | 0.13243500  | 0.03956300  |
| O | -2.63112300 | -0.21031700 | -1.17845400 |
| O | -2.27421100 | 0.12766500  | 1.02637200  |
| C | -4.46111300 | 0.53280300  | 0.11656500  |
| H | -4.70969800 | 0.83918200  | 1.13232300  |
| H | -4.65611100 | 1.35085600  | -0.58393800 |
| H | -5.09004100 | -0.31198000 | -0.18341400 |
| H | -1.67123300 | -0.45639100 | -1.18753500 |
| H | -0.82915600 | -0.33317400 | 1.14936500  |

#### HOTf

E (B3LYP-CPCM/BS1) = -961.993914au

H(B3LYP-CPCM/BS1) = -961.946748au

G(B3LYP-CPCM/BS1) = -961.988873au

E(B3LYP-D3-CPCM/BS2//B3LYP/BS1) = -962.358701au

|   |             |             |             |
|---|-------------|-------------|-------------|
| H | -1.47578700 | 1.89240000  | -0.24043700 |
| O | -1.25864900 | 0.07790000  | 1.44904000  |
| S | -0.85101300 | -0.14514600 | 0.06900700  |
| O | -1.21594100 | -1.32736700 | -0.68666000 |
| O | -1.25723200 | 1.14398300  | -0.83209900 |
| C | 1.00841600  | 0.01065700  | -0.00115500 |
| F | 1.41632800  | -0.07463100 | -1.26257000 |
| F | 1.36787000  | 1.18584900  | 0.51353100  |
| F | 1.53759000  | -0.97678900 | 0.71581800  |

#### HOTf-HOTf

E (B3LYP-CPCM/BS1) = -1924.010343au

H(B3LYP-CPCM/BS1) = -1923.914239au

G(B3LYP-CPCM/BS1) = -1923.980767au

E(B3LYP-D3-CPCM/BS2//B3LYP/BS1) = -1924.740995au

|   |            |             |             |
|---|------------|-------------|-------------|
| O | 2.99543800 | -2.03297700 | -0.06022200 |
| S | 2.07801000 | -0.91438100 | -0.03272400 |
| O | 1.04120600 | -0.77299300 | -1.06906100 |
| O | 1.42190900 | -0.81558100 | 1.41487900  |

|   |             |             |             |
|---|-------------|-------------|-------------|
| C | 3.07792000  | 0.66204800  | -0.07191100 |
| F | 2.25362900  | 1.69508800  | 0.09372900  |
| F | 3.97991800  | 0.63747100  | 0.90058300  |
| F | 3.67955900  | 0.74583400  | -1.25350900 |
| O | -1.18681000 | 0.73832400  | -1.24065100 |
| O | -1.04872400 | 0.25684900  | 1.22461600  |
| H | -0.36993400 | 0.16050900  | -1.20413000 |
| H | 0.50875300  | -0.40901500 | 1.36806900  |
| S | -1.92773200 | 0.78395600  | 0.16863300  |
| C | -3.24930000 | -0.50964800 | -0.08614800 |
| F | -2.66719100 | -1.66546400 | -0.39495100 |
| F | -3.93365900 | -0.63265200 | 1.04640500  |
| F | -4.05537000 | -0.12736500 | -1.06896000 |
| O | -2.57639100 | 2.06946700  | 0.31796200  |

### Propene

E (B3LYP-CPCM/BS1) = -117.905896au

H(B3LYP-CPCM/BS1) = -117.820865au

G(B3LYP-CPCM/BS1) = -117.850889au

E(B3LYP-D3-CPCM/BS2//B3LYP/BS1) = -117.960996au

|   |             |             |             |
|---|-------------|-------------|-------------|
| C | 1.28391000  | -0.22038400 | -0.00000500 |
| C | 0.13350300  | 0.45578100  | -0.00003800 |
| H | 1.30660800  | -1.30884600 | -0.00007900 |
| H | 2.24610900  | 0.28536600  | 0.00019300  |
| H | 0.16315600  | 1.54653900  | -0.00003900 |
| C | -1.23552100 | -0.16344300 | 0.00002300  |
| H | -1.81242800 | 0.15103200  | 0.88030600  |
| H | -1.81268300 | 0.15161200  | -0.87989000 |
| H | -1.18211400 | -1.25743200 | -0.00037400 |

### prod

E (B3LYP-CPCM/BS1) = -347.022565au

H(B3LYP-CPCM/BS1) = -346.866169au

G(B3LYP-CPCM/BS1) = -346.909893au

E(B3LYP-D3-CPCM/BS2//B3LYP/BS1) = -347.184318au

|   |             |             |             |
|---|-------------|-------------|-------------|
| H | 2.29323000  | 1.53719500  | -0.65749300 |
| O | -0.11641100 | 0.52376300  | -0.23074700 |
| C | 2.12726400  | 1.09540900  | 0.33146500  |
| C | 1.13454100  | -0.05607100 | 0.25075500  |
| H | 3.08847300  | 0.73394900  | 0.71235100  |
| H | 1.76206900  | 1.87816700  | 1.00396900  |
| H | 0.94038200  | -0.46807800 | 1.24474000  |
| C | 1.57086300  | -1.17146400 | -0.69403000 |
| H | 2.51904100  | -1.60224800 | -0.35333000 |
| H | 0.82314400  | -1.96919600 | -0.72157600 |
| H | 1.71346100  | -0.78343900 | -1.70893200 |
| C | -1.26656500 | -0.08123700 | 0.13254800  |
| C | -2.46015200 | 0.64349100  | -0.44643200 |
| H | -3.37815100 | 0.14362400  | -0.13533500 |
| H | -2.47038300 | 1.68455000  | -0.10738900 |

|   |             |             |             |
|---|-------------|-------------|-------------|
| H | -2.39733900 | 0.65642900  | -1.53959800 |
| O | -1.32479200 | -1.07272700 | 0.83284100  |

**prod\_P**

E (B3LYP-CPCM/BS1) = -425.401422au

H(B3LYP-CPCM/BS1) = -425.200891au

G(B3LYP-CPCM/BS1) = -425.246379au

E(B3LYP-D3-CPCM/BS2//B3LYP/BS1) = -425.589193au

|   |             |             |             |
|---|-------------|-------------|-------------|
| H | 2.61465900  | -0.40153500 | 1.84557100  |
| O | 0.95693600  | 0.72620000  | 0.02255000  |
| C | 2.32148600  | -1.04446000 | 1.00813500  |
| C | 2.03755300  | -0.19414800 | -0.23078800 |
| H | 3.13886400  | -1.74618200 | 0.80789900  |
| H | 1.44268900  | -1.62178000 | 1.31071300  |
| H | 1.76420400  | -0.83735700 | -1.07725500 |
| C | 3.22788300  | 0.67053500  | -0.63207900 |
| H | 4.09571900  | 0.04095700  | -0.85514900 |
| H | 2.99131900  | 1.26544500  | -1.51975200 |
| H | 3.49538000  | 1.35367700  | 0.18166500  |
| C | -0.34241400 | 0.30708000  | -0.01677100 |
| C | -1.29713200 | 1.29020400  | 0.29336300  |
| C | -0.76964100 | -0.98634600 | -0.34947600 |
| C | -2.65425700 | 0.98528000  | 0.26616000  |
| H | -0.94775500 | 2.28618400  | 0.54863000  |
| C | -2.13816300 | -1.27744200 | -0.37353900 |
| H | -0.05822000 | -1.76850300 | -0.58714100 |
| C | -3.08721300 | -0.30313300 | -0.06855000 |
| H | -3.37864800 | 1.75897900  | 0.50729200  |
| H | -2.45553300 | -2.28421300 | -0.63319700 |
| H | -4.14677300 | -0.54069700 | -0.08839900 |

**PhOH**

E (B3LYP-CPCM/BS1) = -307.462564au

H(B3LYP-CPCM/BS1) = -307.351324au

G(B3LYP-CPCM/BS1) = -307.386737au

E(B3LYP-D3-CPCM/BS2//B3LYP/BS1) = -307.602826au

|   |             |             |             |
|---|-------------|-------------|-------------|
| C | -1.85860400 | 0.02910000  | 0.00000700  |
| C | -1.13080000 | 1.22060300  | 0.00000100  |
| C | 0.26564400  | 1.20037800  | -0.00001900 |
| C | 0.94198000  | -0.02507900 | -0.00008800 |
| C | 0.21968700  | -1.22475800 | -0.00003200 |
| C | -1.17379900 | -1.19057600 | 0.00002300  |
| H | -2.94438100 | 0.04928300  | 0.00004400  |
| H | -1.64780100 | 2.17657800  | 0.00003200  |
| H | 0.82898100  | 2.13154000  | 0.00005700  |
| H | 0.76225000  | -2.16524200 | -0.00003600 |
| H | -1.72823700 | -2.12536500 | 0.00006300  |
| O | 2.30760300  | -0.11329000 | 0.00006700  |
| H | 2.68371300  | 0.78151900  | -0.00005400 |



2PhOH

E (B3LYP-CPCM/BS1) = -614.935790au

H(B3LYP-CPCM/BS1) = -614.710722au

G(B3LYP-CPCM/BS1) = -614.767973au

E(B3LYP-D3-CPCM/BS2//B3LYP/BS1) = -615.216473au

|   |             |             |             |
|---|-------------|-------------|-------------|
| C | -3.36524800 | 1.08139000  | 0.56859000  |
| C | -2.21843400 | 0.27541600  | 0.55190100  |
| C | -2.18695100 | -0.87300900 | -0.25209100 |
| C | -3.29871800 | -1.20652000 | -1.02834800 |
| C | -4.44433600 | -0.40782600 | -1.01511700 |
| C | -4.46759300 | 0.73709500  | -0.21196100 |
| O | -1.16795600 | 0.65586500  | 1.33448300  |
| O | 1.11945200  | -0.98916600 | 0.99666400  |
| C | 2.23106400  | -0.43673400 | 0.39377300  |
| C | 2.10267800  | 0.85665400  | -0.11949200 |
| C | 3.19848300  | 1.45244000  | -0.74258700 |
| C | 4.41393700  | 0.77000200  | -0.85438200 |
| C | 4.52708300  | -0.52072500 | -0.33451600 |
| C | 3.43777600  | -1.13171400 | 0.29150700  |
| H | -3.37321800 | 1.96737300  | 1.19663300  |
| H | -5.35205300 | 1.36883500  | -0.19126500 |
| H | -5.30603500 | -0.67218000 | -1.62114300 |
| H | -3.26379300 | -2.09882400 | -1.64848900 |
| H | -1.29386200 | -1.49221400 | -0.26982200 |
| H | -0.44183600 | 0.00391100  | 1.26112400  |
| H | 1.33102900  | -1.86388800 | 1.36040400  |
| H | 3.52585100  | -2.13820500 | 0.69489500  |
| H | 5.46587900  | -1.06191800 | -0.41346200 |
| H | 5.26339000  | 1.24033100  | -1.34047300 |
| H | 3.09961100  | 2.45818200  | -1.14147100 |
| H | 1.15463000  | 1.37619100  | -0.01977600 |

7 where L = PPh3

E (B3LYP-CPCM/BS1) = -1400.300144au

H(B3LYP-CPCM/BS1) = -1399.949309au

G(B3LYP-CPCM/BS1) = -1400.031423au

E(B3LYP-D3-CPCM/BS2//B3LYP/BS1) = -1401.077524au

|    |             |             |             |
|----|-------------|-------------|-------------|
| Au | 1.46850300  | -0.48499200 | -0.01474200 |
| P  | -0.76468700 | 0.00656200  | -0.00205700 |
| O  | 3.49404300  | -0.94974400 | -0.04738600 |
| C  | 4.27942600  | 0.09593700  | 0.02002000  |
| C  | 5.76029700  | -0.26486900 | -0.00067900 |
| H  | 6.37322000  | 0.63656300  | 0.05835500  |
| H  | 5.99614000  | -0.92556100 | 0.84055600  |
| O  | 3.89966500  | 1.26662100  | 0.09399300  |
| H  | 5.99936100  | -0.81253500 | -0.91868000 |
| C  | -1.12585100 | 1.47844800  | -1.03583100 |
| C  | -2.33586500 | 1.61881500  | -1.73296500 |
| C  | -0.16055700 | 2.49648100  | -1.11486300 |
| C  | -2.57844400 | 2.76590800  | -2.49120500 |

|   |             |             |             |
|---|-------------|-------------|-------------|
| H | -3.08503500 | 0.83420300  | -1.69257700 |
| C | -0.41062300 | 3.64188600  | -1.87114100 |
| H | 0.78761700  | 2.38968500  | -0.59468000 |
| C | -1.61840400 | 3.77790600  | -2.56015300 |
| H | -3.51594000 | 2.86475200  | -3.03110500 |
| H | 0.34296800  | 4.42192700  | -1.92818700 |
| H | -1.80795300 | 4.66714400  | -3.15479200 |
| C | -1.83231100 | -1.34326200 | -0.63794000 |
| C | -3.11993600 | -1.57304500 | -0.12936900 |
| C | -1.34443100 | -2.15762300 | -1.67299900 |
| C | -3.90869900 | -2.59824300 | -0.65547600 |
| H | -3.50524900 | -0.96050300 | 0.67971900  |
| C | -2.13788400 | -3.17777300 | -2.19787400 |
| H | -0.34242400 | -1.99640500 | -2.06175300 |
| C | -3.42029700 | -3.40000200 | -1.68926000 |
| H | -4.90277600 | -2.77142400 | -0.25306700 |
| H | -1.75082000 | -3.80327000 | -2.99705700 |
| H | -4.03446500 | -4.19975900 | -2.09346300 |
| C | -1.38726900 | 0.39505500  | 1.68006300  |
| C | -2.34625200 | 1.39360300  | 1.90719900  |
| C | -0.88787100 | -0.34162500 | 2.76684200  |
| C | -2.80292800 | 1.64485300  | 3.20289100  |
| H | -2.73092600 | 1.98030600  | 1.07898600  |
| C | -1.35099200 | -0.09031700 | 4.05822300  |
| H | -0.13203400 | -1.10496300 | 2.60203800  |
| C | -2.30813300 | 0.90391600  | 4.27793800  |
| H | -3.54182600 | 2.42339500  | 3.37024600  |
| H | -0.95708900 | -0.66384300 | 4.89228800  |
| H | -2.66171000 | 1.10495000  | 5.28529300  |

**10** where L = PPh<sub>3</sub>

E (B3LYP-CPCM/BS1) = -3533.553199au

H(B3LYP-CPCM/BS1) = -3532.866392au

G(B3LYP-CPCM/BS1) = -3533.020481au

E(B3LYP-D3-CPCM/BS2//B3LYP/BS1) = -3535.391957au

|    |             |             |             |
|----|-------------|-------------|-------------|
| Au | 1.64370000  | -0.13057200 | -1.36905200 |
| P  | 2.81035600  | 1.08402500  | 0.17708200  |
| O  | -1.21225400 | -1.60803900 | -2.98334100 |
| C  | -0.03339600 | -1.90001200 | -3.35342900 |
| Au | -1.92033800 | -0.44019800 | -1.38988000 |
| P  | -3.10056500 | 0.66337900  | 0.22802900  |
| O  | 2.41529000  | -3.08627500 | 0.23358600  |
| S  | 0.97209200  | -3.40782700 | 0.13942100  |
| O  | 0.07141400  | -2.22192000 | 0.23913300  |
| O  | 0.59694500  | -4.38698900 | -0.90137700 |
| C  | 0.61715100  | -4.28793900 | 1.74011700  |
| F  | -0.69472600 | -4.59157900 | 1.83109900  |
| F  | 1.31647200  | -5.42732100 | 1.83585500  |
| F  | 0.92953600  | -3.51091700 | 2.79169000  |
| C  | 0.10077000  | -3.05994800 | -4.31735800 |
| H  | 0.95803700  | -2.91616900 | -4.97834400 |

|   |             |             |             |
|---|-------------|-------------|-------------|
| H | 0.27808300  | -3.95711700 | -3.71189500 |
| O | 1.04346100  | -1.33876500 | -2.99645000 |
| H | -0.81493800 | -3.19935800 | -4.89485300 |
| C | -3.50163900 | -0.41863200 | 1.65149100  |
| C | -4.62980200 | -0.17703100 | 2.45366000  |
| C | -2.65927000 | -1.50431600 | 1.94484900  |
| C | -4.89982700 | -1.00188400 | 3.54635900  |
| H | -5.30159300 | 0.64456300  | 2.22341200  |
| C | -2.93852700 | -2.32585100 | 3.04009900  |
| H | -1.79570200 | -1.72409700 | 1.32192200  |
| C | -4.05412300 | -2.07471800 | 3.84156100  |
| H | -5.77519900 | -0.81070300 | 4.16069000  |
| H | -2.28468000 | -3.16709600 | 3.24755300  |
| H | -4.27174300 | -2.71949100 | 4.68858200  |
| C | -4.71358400 | 1.25987400  | -0.41964500 |
| C | -5.26260500 | 2.48876300  | -0.02453400 |
| C | -5.42364200 | 0.44391800  | -1.31618100 |
| C | -6.50691500 | 2.89126300  | -0.51580200 |
| H | -4.72201500 | 3.13489400  | 0.65975800  |
| C | -6.66737000 | 0.84854800  | -1.80012400 |
| H | -5.00043500 | -0.50352000 | -1.63985200 |
| C | -7.21041100 | 2.07312500  | -1.40131800 |
| H | -6.92228800 | 3.84634100  | -0.20690200 |
| H | -7.20736900 | 0.21098900  | -2.49417500 |
| H | -8.17620300 | 2.39013900  | -1.78460100 |
| C | -2.25477300 | 2.14742400  | 0.89139500  |
| C | -2.36524000 | 2.52894100  | 2.23674500  |
| C | -1.50056200 | 2.93753100  | 0.00824700  |
| C | -1.73770500 | 3.69222000  | 2.68795400  |
| H | -2.93272800 | 1.92041900  | 2.93336200  |
| C | -0.87897100 | 4.10009300  | 0.46302200  |
| H | -1.39508900 | 2.63748800  | -1.03096000 |
| C | -0.99759500 | 4.47846600  | 1.80327600  |
| H | -1.82489000 | 3.97842500  | 3.73222600  |
| H | -0.28986600 | 4.69983000  | -0.22389900 |
| H | -0.50532700 | 5.37963200  | 2.15760400  |
| C | 2.33620200  | 0.79293900  | 1.92098700  |
| C | 1.05888000  | 0.29652200  | 2.21625800  |
| C | 3.24247700  | 1.04330800  | 2.96616100  |
| C | 0.68508300  | 0.07359000  | 3.54297000  |
| H | 0.37749500  | 0.04563900  | 1.41127500  |
| C | 2.86053000  | 0.82514800  | 4.28959100  |
| H | 4.24828100  | 1.39074900  | 2.74846500  |
| C | 1.58076500  | 0.34282400  | 4.57900200  |
| H | -0.30083300 | -0.32696300 | 3.75978900  |
| H | 3.56630400  | 1.01893400  | 5.09236200  |
| H | 1.28995500  | 0.16237100  | 5.61022500  |
| C | 4.58375300  | 0.61464900  | 0.08280500  |
| C | 5.61160900  | 1.56525800  | 0.01359100  |
| C | 4.89709900  | -0.75681000 | 0.09223700  |
| C | 6.94451700  | 1.14886300  | -0.04225000 |
| H | 5.37989000  | 2.62548300  | 0.00095700  |

|   |            |             |             |
|---|------------|-------------|-------------|
| C | 6.23077200 | -1.16119800 | 0.04100900  |
| H | 4.10446000 | -1.50097600 | 0.13710500  |
| C | 7.25496800 | -0.21172400 | -0.02786600 |
| H | 7.73661800 | 1.89038900  | -0.09854400 |
| H | 6.46808200 | -2.22119100 | 0.04829800  |
| H | 8.29191700 | -0.53295600 | -0.07388500 |
| C | 2.74171400 | 2.89474300  | -0.12312700 |
| C | 2.88786700 | 3.83017400  | 0.91247300  |
| C | 2.57044000 | 3.35088600  | -1.44041400 |
| C | 2.87209100 | 5.19801900  | 0.63169300  |
| H | 3.00588800 | 3.49686600  | 1.93824800  |
| C | 2.55752000 | 4.71858600  | -1.71762400 |
| H | 2.44226600 | 2.63346600  | -2.24665300 |
| C | 2.70838400 | 5.64450400  | -0.68168000 |
| H | 2.98615300 | 5.91334100  | 1.44138700  |
| H | 2.42558900 | 5.05892600  | -2.74072400 |
| H | 2.69581400 | 6.70932500  | -0.89709900 |

**Ts6** where L = PPh3

E (B3LYP-D3-CPCM/BS1) = -2480.185018au

H(B3LYP-D3-CPCM/BS1) = -2479.700218au

G(B3LYP-D3-CPCM/BS1) = -2479.814897au

E(B3LYP-D3-CPCM/BS2//B3LYP-D3/BS1) = -2481.393293au

|    |             |             |             |
|----|-------------|-------------|-------------|
| Au | 0.01788400  | 1.01779800  | 0.28612300  |
| P  | -2.08875100 | 0.06440900  | 0.03271400  |
| O  | 3.96090200  | -2.99808300 | 1.16170500  |
| S  | 3.32644300  | -1.76834600 | 0.65665100  |
| O  | 2.25505100  | -1.20049600 | 1.52389800  |
| O  | 4.24376600  | -0.74975700 | 0.08580900  |
| C  | 2.37423900  | -2.34552900 | -0.83317200 |
| F  | 1.79358600  | -1.30205300 | -1.47507600 |
| F  | 3.17175800  | -2.96853000 | -1.71074900 |
| F  | 1.39261100  | -3.19340100 | -0.47771800 |
| C  | 2.06699400  | 1.86132700  | 0.59557800  |
| H  | 1.66182200  | 2.76468100  | 1.06132500  |
| H  | 2.12659600  | 0.89911500  | 1.13671200  |
| C  | 2.68931200  | 1.97568500  | -0.78526800 |
| C  | 2.20238000  | 3.15807000  | -1.60674800 |
| H  | 2.30873300  | 4.09419500  | -1.04733600 |
| H  | 2.76626200  | 3.24002900  | -2.54047100 |
| H  | 1.14304300  | 3.02054400  | -1.84667300 |
| H  | 2.59263300  | 1.03920800  | -1.33125900 |
| O  | 4.20453000  | 2.11522000  | -0.79021900 |
| C  | 4.93155600  | 2.07133700  | 0.28989800  |
| C  | 6.39343600  | 1.85487800  | 0.06355700  |
| H  | 6.54669300  | 0.76974400  | 0.02303100  |
| H  | 6.70958400  | 2.28798200  | -0.88746100 |
| H  | 6.96889000  | 2.26608700  | 0.89436400  |
| O  | 4.46220800  | 2.19125400  | 1.44749100  |
| H  | 3.20140400  | 2.05536100  | 1.26356700  |
| C  | -2.36648600 | -1.28250100 | 1.24344900  |

|   |             |             |             |
|---|-------------|-------------|-------------|
| C | -3.64250900 | -1.54374100 | 1.76838100  |
| C | -1.27493900 | -2.07438500 | 1.63969800  |
| C | -3.82492500 | -2.59100300 | 2.67305600  |
| H | -4.48999700 | -0.93011700 | 1.47842100  |
| C | -1.46772200 | -3.12144500 | 2.54211400  |
| H | -0.27666800 | -1.87899300 | 1.25824600  |
| C | -2.73914400 | -3.38042900 | 3.05952500  |
| H | -4.81414900 | -2.78548300 | 3.07774800  |
| H | -0.61832900 | -3.72634600 | 2.84535800  |
| H | -2.88270400 | -4.19192700 | 3.76745000  |
| C | -3.44926800 | 1.27051900  | 0.27707400  |
| C | -4.61660500 | 1.24294200  | -0.50027700 |
| C | -3.31367200 | 2.24065200  | 1.28409200  |
| C | -5.63402200 | 2.17201900  | -0.26983000 |
| H | -4.73231100 | 0.50326600  | -1.28623500 |
| C | -4.33459000 | 3.16234900  | 1.51384000  |
| H | -2.40884200 | 2.27551700  | 1.88539000  |
| C | -5.49529500 | 3.13052800  | 0.73566100  |
| H | -6.53290900 | 2.14582800  | -0.87918900 |
| H | -4.22022200 | 3.90896100  | 2.29444200  |
| H | -6.28670400 | 3.85387600  | 0.91039500  |
| C | -2.33407100 | -0.65913600 | -1.63345400 |
| C | -3.05597000 | -1.84676700 | -1.82526800 |
| C | -1.78780500 | 0.00374700  | -2.74480300 |
| C | -3.23282800 | -2.35811100 | -3.11273700 |
| H | -3.47279300 | -2.37669600 | -0.97465200 |
| C | -1.97133400 | -0.50859500 | -4.02878600 |
| H | -1.21385100 | 0.91594400  | -2.60390500 |
| C | -2.69273900 | -1.69111800 | -4.21401200 |
| H | -3.78834400 | -3.28110600 | -3.25172500 |
| H | -1.54263900 | 0.00937900  | -4.88181000 |
| H | -2.82708600 | -2.09466300 | -5.21356400 |

**Ts7** where L = PPh3

E (B3LYP-CPCM/BS1) = -2480.202897au

H(B3LYP-CPCM/BS1) = -2479.718721au

G(B3LYP-CPCM/BS1) = -2479.836006au

E(B3LYP-D3-CPCM/BS2//B3LYP/BS1) = -2481.408172au

|    |             |             |             |
|----|-------------|-------------|-------------|
| Au | 0.49410500  | -1.17608100 | -0.74551400 |
| P  | 2.13714400  | 0.14482400  | 0.13245200  |
| O  | -0.96082700 | -2.42063000 | -1.63139100 |
| C  | -2.03694700 | -2.61596800 | -0.96431500 |
| O  | -5.28134900 | 1.64935600  | 0.28355700  |
| S  | -3.80276100 | 1.72869100  | 0.23114900  |
| O  | -3.22035800 | 3.08365900  | 0.25979100  |
| O  | -3.11975500 | 0.73739700  | 1.11916900  |
| C  | -3.39435100 | 1.10105100  | -1.46962800 |
| F  | -2.06342600 | 1.04273800  | -1.65629500 |
| F  | -3.89333100 | -0.13965800 | -1.64387800 |
| F  | -3.91578100 | 1.89494800  | -2.41362600 |
| C  | -4.65025300 | -2.17144700 | 1.39531900  |

|   |             |             |             |
|---|-------------|-------------|-------------|
| C | -4.78797500 | -0.94098500 | 2.06328100  |
| H | -4.47518400 | -3.03954400 | 2.03727700  |
| H | -3.57412800 | -2.08387400 | 0.83291100  |
| H | -5.31762700 | -0.12741300 | 1.57132900  |
| C | -4.32618800 | -0.70273900 | 3.44401200  |
| H | -3.85105200 | 0.27810100  | 3.52378500  |
| H | -5.22781600 | -0.67349800 | 4.07900000  |
| H | -3.66652800 | -1.49084000 | 3.81595800  |
| O | -2.19926400 | -2.19114400 | 0.20956100  |
| C | -3.13343400 | -3.38394000 | -1.67642300 |
| H | -3.63227100 | -4.06981600 | -0.98632700 |
| H | -3.87707100 | -2.66794600 | -2.04342200 |
| H | -2.73238200 | -3.93631900 | -2.52749700 |
| H | -5.34988300 | -2.34306800 | 0.57499900  |
| C | 2.44790300  | -0.24088500 | 1.89783400  |
| C | 2.36748100  | -1.57670300 | 2.32407400  |
| C | 2.77796700  | 0.76037300  | 2.82342500  |
| C | 2.62483000  | -1.90579600 | 3.65469700  |
| H | 2.09626300  | -2.35565500 | 1.61637700  |
| C | 3.03055200  | 0.42583900  | 4.15561800  |
| H | 2.82970800  | 1.79826200  | 2.51000200  |
| C | 2.95589400  | -0.90482200 | 4.57204200  |
| H | 2.55817400  | -2.94134500 | 3.97567900  |
| H | 3.28054500  | 1.20763600  | 4.86711400  |
| H | 3.14868600  | -1.16110700 | 5.61000900  |
| C | 1.73364200  | 1.92689300  | 0.04462500  |
| C | 2.72402800  | 2.89659100  | -0.18002000 |
| C | 0.39797100  | 2.32430300  | 0.22024900  |
| C | 2.37737900  | 4.24811900  | -0.22290800 |
| H | 3.75806900  | 2.60140400  | -0.32928000 |
| C | 0.05737600  | 3.67687200  | 0.17615300  |
| H | -0.38041900 | 1.58538300  | 0.38569700  |
| C | 1.04724100  | 4.63758700  | -0.04602800 |
| H | 3.14685800  | 4.99417600  | -0.40111000 |
| H | -0.98389700 | 3.95726500  | 0.29966500  |
| H | 0.78105900  | 5.69022300  | -0.08845500 |
| C | 3.74036500  | -0.07511500 | -0.73089900 |
| C | 4.96239000  | -0.05478600 | -0.04205100 |
| C | 3.73670300  | -0.25053500 | -2.12464000 |
| C | 6.16261000  | -0.20378900 | -0.74064100 |
| H | 4.98050800  | 0.07060200  | 1.03591000  |
| C | 4.93821500  | -0.39350100 | -2.81795500 |
| H | 2.79398100  | -0.28002500 | -2.66465100 |
| C | 6.15260700  | -0.37210500 | -2.12663500 |
| H | 7.10408700  | -0.19111600 | -0.19887000 |
| H | 4.92463600  | -0.52949600 | -3.89548500 |
| H | 7.08766200  | -0.49142500 | -2.66662400 |

**Ts8** where L = PPh3

E (B3LYP-CPCM/BS1) = -4613.446412au

H(B3LYP-CPCM/BS1) = -4612.628692au

G(B3LYP-CPCM/BS1) = -4612.815850au

E(B3LYP-D3-CPCM/BS2//B3LYP/BS1) = -4615.725639au

|    |             |             |             |
|----|-------------|-------------|-------------|
| Au | 1.72824400  | -0.58653400 | -1.39218600 |
| P  | 3.71435500  | 0.41026900  | -0.84625900 |
| O  | -1.44071500 | -1.92243400 | -0.67618300 |
| C  | -0.79061600 | -2.36877800 | -1.70418900 |
| Au | -1.46505600 | 0.10748100  | 0.08453600  |
| P  | -1.72249200 | 2.14493500  | 1.08693400  |
| O  | 2.64755700  | -2.49058200 | 1.50876400  |
| S  | 1.24498100  | -2.94648800 | 1.65415600  |
| O  | 0.30325000  | -1.91574100 | 2.16468800  |
| O  | 0.73274700  | -3.76414500 | 0.52732400  |
| C  | 1.32003800  | -4.16721400 | 3.05410000  |
| F  | 0.10314700  | -4.70036400 | 3.27700000  |
| F  | 2.16814400  | -5.16748600 | 2.77146600  |
| F  | 1.72897700  | -3.57522000 | 4.18742200  |
| C  | -1.22658200 | -3.69228300 | -2.26817900 |
| H  | -0.67952200 | -3.90882700 | -3.18611800 |
| H  | -1.00485900 | -4.46785500 | -1.52654000 |
| O  | 0.14601600  | -1.73985800 | -2.24989600 |
| H  | -2.30485600 | -3.66977800 | -2.45456100 |
| H  | -2.11711100 | -2.81854300 | 0.18553500  |
| O  | -4.48066400 | -2.67050200 | -2.26467500 |
| S  | -4.59339200 | -1.24172900 | -1.87434800 |
| O  | -4.72366100 | -1.02278400 | -0.40551800 |
| O  | -3.66474700 | -0.31971600 | -2.56200100 |
| C  | -6.26754000 | -0.75162200 | -2.51871700 |
| F  | -6.51957100 | 0.54275600  | -2.24705800 |
| F  | -6.33365400 | -0.91924700 | -3.84692700 |
| F  | -7.23174100 | -1.49246100 | -1.94924700 |
| C  | -2.45326600 | -3.49575300 | 1.23227600  |
| C  | -3.76577900 | -3.67255900 | 0.84176900  |
| H  | -1.76080600 | -4.33575300 | 1.21389800  |
| H  | -2.21094700 | -2.70904200 | 1.94820000  |
| H  | -4.45458000 | -2.83868100 | 0.96994200  |
| C  | -4.29642600 | -4.84663500 | 0.12287800  |
| H  | -5.18544400 | -5.21254400 | 0.65651900  |
| H  | -4.64907600 | -4.50696400 | -0.86154500 |
| H  | -3.56832200 | -5.65407000 | 0.01733400  |
| C  | -1.73537500 | 1.96110900  | 2.91197000  |
| C  | -2.44946800 | 2.85200500  | 3.72949700  |
| C  | -1.00405300 | 0.91371300  | 3.49921400  |
| C  | -2.41829400 | 2.70687700  | 5.11764300  |
| H  | -3.03635700 | 3.65093300  | 3.28695400  |
| C  | -0.97734500 | 0.77783600  | 4.88878100  |
| H  | -0.47144400 | 0.19143000  | 2.88563300  |
| C  | -1.68079800 | 1.67264600  | 5.69865900  |
| H  | -2.97647700 | 3.39849500  | 5.74228900  |
| H  | -0.41413000 | -0.03814100 | 5.33231300  |
| H  | -1.66305900 | 1.55859200  | 6.77895900  |
| C  | -3.27996300 | 2.98844500  | 0.62074900  |

|   |             |             |             |
|---|-------------|-------------|-------------|
| C | -3.37465400 | 4.39042800  | 0.62077900  |
| C | -4.40117100 | 2.21417400  | 0.28297800  |
| C | -4.58457400 | 5.00787500  | 0.30105400  |
| H | -2.50886200 | 5.00017300  | 0.86042000  |
| C | -5.60612700 | 2.84147200  | -0.03914800 |
| H | -4.34069200 | 1.12959100  | 0.24645300  |
| C | -5.70080400 | 4.23446900  | -0.02776400 |
| H | -4.65077200 | 6.09224400  | 0.30102100  |
| H | -6.45959900 | 2.23328000  | -0.32047000 |
| H | -6.63884600 | 4.71824200  | -0.28577800 |
| C | -0.37949200 | 3.32370300  | 0.67816900  |
| C | 0.14349800  | 4.21257200  | 1.62893600  |
| C | 0.10369300  | 3.35704300  | -0.64054400 |
| C | 1.13216400  | 5.12835800  | 1.26090800  |
| H | -0.21517400 | 4.19171400  | 2.65321200  |
| C | 1.08717300  | 4.27681200  | -1.00340100 |
| H | -0.28520400 | 2.66043900  | -1.37862400 |
| C | 1.60246800  | 5.16286100  | -0.05272600 |
| H | 1.53437200  | 5.81132700  | 2.00375200  |
| H | 1.46028100  | 4.29212100  | -2.02281800 |
| H | 2.37432200  | 5.87260800  | -0.33603800 |
| C | 3.91268600  | 0.87149800  | 0.91062700  |
| C | 2.78565600  | 1.23168900  | 1.66278000  |
| C | 5.18185900  | 0.88380100  | 1.51106000  |
| C | 2.92795800  | 1.61162500  | 2.99734400  |
| H | 1.79957100  | 1.20142200  | 1.21017800  |
| C | 5.31810200  | 1.26620500  | 2.84622500  |
| H | 6.05845800  | 0.58472200  | 0.94461400  |
| C | 4.19275500  | 1.62978200  | 3.58949400  |
| H | 2.04789800  | 1.87599100  | 3.57593300  |
| H | 6.30195300  | 1.26954500  | 3.30653100  |
| H | 4.30060500  | 1.91717600  | 4.63163400  |
| C | 5.09610000  | -0.73363900 | -1.23302100 |
| C | 6.15988400  | -0.35923500 | -2.06637500 |
| C | 5.06498400  | -2.02312400 | -0.67157600 |
| C | 7.18639800  | -1.26774600 | -2.33736300 |
| H | 6.19315700  | 0.63301500  | -2.50407600 |
| C | 6.09748300  | -2.91962900 | -0.94577100 |
| H | 4.24572600  | -2.31944400 | -0.02032400 |
| C | 7.15636000  | -2.54640400 | -1.77911200 |
| H | 8.00673600  | -0.97242000 | -2.98547600 |
| H | 6.07065900  | -3.91395500 | -0.50918600 |
| H | 7.95455900  | -3.25171900 | -1.99333300 |
| C | 4.00490900  | 1.92573300  | -1.83972900 |
| C | 4.77362900  | 2.99059600  | -1.34599800 |
| C | 3.47184000  | 2.00468200  | -3.13680700 |
| C | 5.00725900  | 4.11453100  | -2.14089800 |
| H | 5.18525700  | 2.94868800  | -0.34277300 |
| C | 3.71163200  | 3.12779400  | -3.92950400 |
| H | 2.86555800  | 1.19025900  | -3.52457900 |
| C | 4.47834300  | 4.18510600  | -3.43168800 |
| H | 5.60234400  | 4.93456700  | -1.74911100 |



|   |            |            |             |
|---|------------|------------|-------------|
| H | 3.29533300 | 3.17777600 | -4.93148300 |
| H | 4.66083400 | 5.06135700 | -4.04738700 |

7 optimized by B3LYP-D3 functional

E (B3LYP-D3-CPCM/BS1) = -825.131670au

H(B3LYP-D3-CPCM/BS1) = -824.950931au

G(B3LYP-D3-CPCM/BS1) = -825.007173au

E(B3LYP-D3-CPCM/BS2//B3LYP-D3/BS1) = -825.651678au

|    |             |             |             |
|----|-------------|-------------|-------------|
| Au | 0.14560900  | -0.25302600 | -0.00011500 |
| P  | -2.08691900 | 0.16438400  | -0.00032000 |
| C  | -2.96269700 | -0.37642000 | 1.51958800  |
| H  | -2.51228000 | 0.11373300  | 2.38727500  |
| H  | -4.02518500 | -0.11715800 | 1.46208200  |
| H  | -2.85539700 | -1.45851500 | 1.63528200  |
| C  | -3.01354000 | -0.61799000 | -1.37817700 |
| H  | -4.07586900 | -0.35806700 | -1.32184300 |
| H  | -2.60177400 | -0.27231500 | -2.33053700 |
| H  | -2.89899300 | -1.70410300 | -1.32218300 |
| C  | -2.46338800 | 1.95528000  | -0.14053800 |
| H  | -2.03849300 | 2.34098400  | -1.07138800 |
| H  | -3.54532900 | 2.12406100  | -0.13124600 |
| H  | -2.00093400 | 2.48536900  | 0.69673400  |
| O  | 2.17638200  | -0.68381900 | 0.00250000  |
| C  | 2.96447800  | 0.36260400  | 0.00007000  |
| C  | 4.44266400  | -0.00905200 | 0.00096500  |
| H  | 5.06215700  | 0.88985300  | 0.00228300  |
| H  | 4.67232100  | -0.61802700 | 0.88193600  |
| O  | 2.59135200  | 1.53716200  | -0.00309200 |
| H  | 4.67348800  | -0.61583300 | -0.88126200 |

10 optimized by B3LYP-D3 functional

E (B3LYP-D3-CPCM/BS1) = -2383.263037au

H(B3LYP-D3-CPCM/BS1) = -2382.916183au

G(B3LYP-D3-CPCM/BS1) = -2383.018037au

E(B3LYP-D3-CPCM/BS2//B3LYP-D3/BS1) = -2384.536488au

|    |             |             |             |
|----|-------------|-------------|-------------|
| Au | -1.93779300 | -0.68611000 | -0.01287600 |
| P  | -3.11116000 | 0.99825400  | 0.96228800  |
| C  | -4.67820600 | 0.40440400  | 1.71601400  |
| H  | -4.45359700 | -0.29962300 | 2.52222700  |
| H  | -5.24752200 | 1.25006000  | 2.11637900  |
| H  | -5.27408800 | -0.10983600 | 0.95690000  |
| C  | -3.63123900 | 2.25660300  | -0.26361100 |
| H  | -4.24810300 | 3.01707600  | 0.22759700  |
| H  | -2.74598500 | 2.72302400  | -0.70579800 |
| H  | -4.20954400 | 1.76917500  | -1.05364900 |
| C  | -2.29003600 | 1.94855300  | 2.29314300  |
| H  | -1.37793300 | 2.39034200  | 1.88610500  |
| H  | -2.96624900 | 2.73197900  | 2.65159100  |
| H  | -2.03597200 | 1.28028600  | 3.12044300  |
| O  | 0.93003300  | -2.18119700 | -1.64527100 |

|    |             |             |             |
|----|-------------|-------------|-------------|
| C  | -0.25064000 | -2.59697400 | -1.83872000 |
| Au | 1.56617300  | -1.14487300 | 0.07494400  |
| P  | 2.34716700  | -0.16802000 | 1.96846000  |
| C  | 3.50897200  | -1.23466000 | 2.91056100  |
| H  | 4.38560400  | -1.45081300 | 2.29323300  |
| H  | 3.82660800  | -0.73461500 | 3.83178600  |
| H  | 3.01433300  | -2.17807700 | 3.15820500  |
| C  | 3.24201600  | 1.41298400  | 1.74069800  |
| H  | 3.62610700  | 1.76150400  | 2.70516400  |
| H  | 4.07119100  | 1.26860000  | 1.04383100  |
| H  | 2.55042400  | 2.14508600  | 1.32273900  |
| C  | 0.98740600  | 0.20743100  | 3.13390100  |
| H  | 1.36986000  | 0.70501500  | 4.03116200  |
| H  | 0.28740500  | 0.85686000  | 2.60831800  |
| H  | 0.48016800  | -0.72084900 | 3.41132900  |
| O  | -0.60769500 | 3.30169100  | -1.38331900 |
| S  | 0.18867500  | 2.10532500  | -1.03269400 |
| O  | 0.31739800  | 1.86822100  | 0.43300700  |
| O  | -0.08380900 | 0.89180500  | -1.83882000 |
| C  | 1.92711000  | 2.55489600  | -1.53073000 |
| F  | 2.75661600  | 1.50239300  | -1.36848700 |
| F  | 1.97666100  | 2.93190900  | -2.81349000 |
| F  | 2.39115400  | 3.56223300  | -0.76848200 |
| C  | -0.48721500 | -3.43694200 | -3.07738700 |
| H  | -1.10910900 | -4.30074600 | -2.82704900 |
| H  | -1.03942000 | -2.83043700 | -3.80440400 |
| O  | -1.26206600 | -2.38936200 | -1.09876400 |
| H  | 0.45513300  | -3.76094000 | -3.52127800 |

**TS3** optimized by B3LYP-D3 functional

E (B3LYP-D3-CPCM/BS1) = -1079.903296au

H(B3LYP-D3-CPCM/BS1) = -1079.773864au

G(B3LYP-D3-CPCM/BS1) = -1079.825456au

E(B3LYP-D3-CPCM/BS2//B3LYP-D3/BS1) = -1080.308453au

|   |             |             |             |
|---|-------------|-------------|-------------|
| H | -1.90049300 | -1.22452800 | -0.97943900 |
| C | -2.47814600 | -0.66180400 | -0.25076800 |
| C | -2.26314900 | -0.91844200 | 1.10442900  |
| H | -1.29575800 | -0.15500500 | 1.28755600  |
| H | -1.80381300 | -1.87427500 | 1.36056700  |
| H | -3.00842600 | -0.54338200 | 1.80788500  |
| O | -0.08724600 | 0.62809300  | 1.50416700  |
| S | 0.50441000  | 0.90373200  | 0.13059400  |
| O | -0.54999400 | 0.89508000  | -0.91300000 |
| O | 1.48779600  | 1.98276000  | 0.10822500  |
| C | 1.44139000  | -0.66650500 | -0.19885200 |
| F | 2.00792300  | -0.62666600 | -1.40720000 |
| F | 2.38492200  | -0.86171800 | 0.72379900  |
| F | 0.57944400  | -1.70547600 | -0.16153900 |
| C | -3.44812700 | 0.31633200  | -0.77931700 |
| H | -2.99588900 | 0.91041900  | -1.57808300 |
| H | -4.27445700 | -0.25658100 | -1.23125800 |

H -3.85857400 0.96342800 -0.00036000

**TS6** optimized by B3LYP-D3 functional

E (B3LYP-D3-CPCM/BS1) = -1905.052585au

H(B3LYP-D3-CPCM/BS1) = -1904.737625au

G(B3LYP-D3-CPCM/BS1) = -1904.825127au

E(B3LYP-D3-CPCM/BS2//B3LYP-D3/BS1) = -1905.965164au

|    |             |             |             |
|----|-------------|-------------|-------------|
| Au | -0.39575700 | -1.26205300 | -0.02588000 |
| P  | -2.70744800 | -1.22868600 | 0.03096400  |
| C  | -3.43571700 | -2.84994800 | 0.50096000  |
| H  | -3.08652300 | -3.13277300 | 1.49812000  |
| H  | -4.52935500 | -2.78974900 | 0.50157500  |
| H  | -3.11401500 | -3.61371300 | -0.21289100 |
| C  | -3.46137500 | -0.82037200 | -1.58744800 |
| H  | -4.55396200 | -0.83791000 | -1.50989800 |
| H  | -3.12042100 | 0.17923500  | -1.86688500 |
| H  | -3.13436200 | -1.54721000 | -2.33642300 |
| C  | -3.41904000 | -0.02875000 | 1.21788500  |
| H  | -3.09414400 | 0.96934700  | 0.91956600  |
| H  | -4.51241300 | -0.09146900 | 1.19929800  |
| H  | -3.05448900 | -0.24781000 | 2.22523600  |
| O  | -0.42244100 | 3.73565300  | -1.57464900 |
| S  | -0.71149400 | 2.41203400  | -0.99559800 |
| O  | -2.14371300 | 2.02360600  | -0.94485000 |
| O  | 0.20835600  | 1.32067300  | -1.42029200 |
| C  | -0.29332600 | 2.63534900  | 0.80774600  |
| F  | -0.64492900 | 1.54433500  | 1.53297500  |
| F  | 1.03133400  | 2.81857800  | 0.97704600  |
| F  | -0.93414900 | 3.68942400  | 1.32654400  |
| C  | 1.85292200  | -1.40461500 | -0.11197400 |
| H  | 1.77314700  | -2.26249300 | 0.56526400  |
| H  | 1.70836800  | -1.53729800 | -1.18877200 |
| C  | 2.34447400  | -0.07644300 | 0.41202900  |
| C  | 2.27749800  | 0.08162900  | 1.91999500  |
| H  | 2.75569700  | -0.76492900 | 2.42532400  |
| H  | 2.76666700  | 1.00874400  | 2.22838800  |
| H  | 1.22955200  | 0.12970100  | 2.22492100  |
| H  | 1.87735500  | 0.75557100  | -0.10800900 |
| O  | 3.82807300  | 0.22663700  | 0.07098300  |
| C  | 4.66321500  | -0.68576100 | -0.30444500 |
| C  | 6.04260800  | -0.21218700 | -0.64325400 |
| H  | 6.76084100  | -1.01554400 | -0.46977000 |
| H  | 6.06469100  | 0.05120600  | -1.70753300 |
| H  | 6.29644100  | 0.67559500  | -0.06139300 |
| O  | 4.35543000  | -1.90514300 | -0.42081800 |
| H  | 3.12386300  | -1.90440700 | -0.29754000 |

**TS7** optimized by B3LYP-D3 functional

E (B3LYP-D3-CPCM/BS1) = -1905.073946au

H(B3LYP-D3-CPCM/BS1) = -1904.759812au

G(B3LYP-D3-CPCM/BS1) = -1904.847653au

E(B3LYP-D3-CPCM/BS2//B3LYP-D3/BS1) = -1905.986205au

|    |             |             |             |
|----|-------------|-------------|-------------|
| Au | -1.39643700 | 0.83798400  | -0.16926100 |
| P  | -2.79895900 | -0.82760400 | 0.45688800  |
| C  | -3.11028600 | -2.06832900 | -0.85385200 |
| H  | -2.14671500 | -2.48143600 | -1.15869400 |
| H  | -3.75873700 | -2.86550700 | -0.47469100 |
| H  | -3.58719700 | -1.58321700 | -1.71008200 |
| C  | -4.46236500 | -0.25986600 | 0.98965000  |
| H  | -5.07472000 | -1.11293200 | 1.30096900  |
| H  | -4.35630100 | 0.43731100  | 1.82554000  |
| H  | -4.95333900 | 0.25849800  | 0.16117400  |
| C  | -2.13742200 | -1.77560900 | 1.87746700  |
| H  | -1.99212400 | -1.10164300 | 2.72619600  |
| H  | -2.82917400 | -2.57801600 | 2.15472100  |
| H  | -1.17396400 | -2.19268100 | 1.57847300  |
| O  | -0.04584800 | 2.32077600  | -0.84677000 |
| C  | 0.99734300  | 2.51335600  | -0.13668600 |
| O  | 2.47387100  | -2.69835900 | 0.23185200  |
| S  | 1.38726500  | -1.75817700 | -0.11296200 |
| O  | 0.09205200  | -2.35259900 | -0.50179500 |
| O  | 1.27001900  | -0.60063900 | 0.82908700  |
| C  | 2.00021200  | -0.93710300 | -1.66579600 |
| F  | 1.10308500  | -0.06122500 | -2.14088400 |
| F  | 3.14105000  | -0.25653000 | -1.39738900 |
| F  | 2.26518900  | -1.83897400 | -2.61670300 |
| C  | 3.42574600  | 1.33455800  | 1.97256200  |
| C  | 3.39626900  | -0.06649600 | 1.88391900  |
| H  | 3.41425500  | 1.75004100  | 2.98329800  |
| H  | 2.32980400  | 1.69623300  | 1.54424600  |
| H  | 3.74414800  | -0.54183200 | 0.97228800  |
| C  | 3.07306400  | -0.96014400 | 3.01496400  |
| H  | 2.67268900  | -1.91172300 | 2.66538300  |
| H  | 4.02743600  | -1.16098500 | 3.53139400  |
| H  | 2.40239900  | -0.48315100 | 3.73538500  |
| O  | 1.05631500  | 2.25517200  | 1.09858200  |
| C  | 2.21393200  | 3.04350400  | -0.86848600 |
| H  | 2.79215300  | 2.18123800  | -1.22031700 |
| H  | 1.91601600  | 3.62926700  | -1.74001800 |
| H  | 2.84269200  | 3.64040000  | -0.20377900 |
| H  | 4.10323700  | 1.83682800  | 1.27894300  |

TS8 optimized by B3LYP-D3 functional

E(B3LYP-D3-CPCM/BS1) = -3463.191916au

H(B3LYP-D3-CPCM/BS1) = -3462.713102au

G(B3LYP-D3-CPCM/BS1) = -3462.847925au

E(B3LYP-D3-CPCM/BS2//B3LYP-D3/BS1) = -3464.867238au

|    |             |             |             |
|----|-------------|-------------|-------------|
| Au | -2.41642800 | -0.73954300 | -1.20594100 |
| P  | -3.91343700 | -1.51985200 | 0.30821100  |
| C  | -4.22940700 | -3.32455700 | 0.18635100  |

|    |             |             |             |
|----|-------------|-------------|-------------|
| H  | -3.29494700 | -3.87254600 | 0.33446000  |
| H  | -4.95559700 | -3.63383700 | 0.94544900  |
| H  | -4.61849400 | -3.55990300 | -0.80826200 |
| C  | -5.55448200 | -0.72502300 | 0.15470400  |
| H  | -6.22908300 | -1.10058200 | 0.93135800  |
| H  | -5.41000900 | 0.35131500  | 0.26839200  |
| H  | -5.97500900 | -0.93760300 | -0.83206600 |
| C  | -3.38154300 | -1.22076500 | 2.03182400  |
| H  | -3.31644100 | -0.14161100 | 2.17687700  |
| H  | -4.09912100 | -1.66610000 | 2.72884600  |
| H  | -2.39152700 | -1.65265100 | 2.18516500  |
| O  | 0.49188600  | 0.82475600  | -1.25207200 |
| C  | -0.20608100 | 0.94961800  | -2.32640900 |
| Au | 0.67634800  | -0.88854100 | 0.06324300  |
| P  | 1.16849200  | -2.75441400 | 1.25723600  |
| C  | 2.02430000  | -3.99627800 | 0.21994100  |
| H  | 2.93920900  | -3.53669900 | -0.16071700 |
| H  | 2.26488700  | -4.88241200 | 0.81698700  |
| H  | 1.37825000  | -4.27824900 | -0.61629300 |
| C  | 2.26630800  | -2.44991300 | 2.68646900  |
| H  | 2.49485800  | -3.39538800 | 3.18951400  |
| H  | 3.17911000  | -1.97702400 | 2.32115300  |
| H  | 1.77079400  | -1.76789600 | 3.38285400  |
| C  | -0.28417700 | -3.64008600 | 1.94656000  |
| H  | 0.03659400  | -4.58072300 | 2.40648600  |
| H  | -0.76841400 | -3.01898300 | 2.70397400  |
| H  | -0.99664300 | -3.85180800 | 1.14513100  |
| O  | -3.57997300 | 1.74833200  | 0.76067100  |
| S  | -2.17327700 | 2.21367800  | 0.67657900  |
| O  | -1.19061300 | 1.34062100  | 1.36999600  |
| O  | -1.75500200 | 2.70149300  | -0.65958800 |
| C  | -2.16969100 | 3.75772200  | 1.71565400  |
| F  | -0.94271800 | 4.31576400  | 1.72303200  |
| F  | -3.03640200 | 4.65899100  | 1.23235000  |
| F  | -2.50881000 | 3.47569500  | 2.98273700  |
| C  | 0.11078900  | 2.12102300  | -3.21561600 |
| H  | -0.28314000 | 1.95642200  | -4.21920700 |
| H  | -0.38710700 | 2.99218500  | -2.77527100 |
| O  | -1.12630500 | 0.15902800  | -2.65898800 |
| H  | 1.18741300  | 2.30432200  | -3.24996300 |
| H  | 1.11405600  | 1.99494000  | -0.63717400 |
| O  | 3.46376400  | 0.28148000  | -1.14049500 |
| S  | 4.14722300  | -0.30714700 | 0.04159900  |
| O  | 3.64476500  | 0.20993500  | 1.34281000  |
| O  | 4.37416100  | -1.76821400 | -0.00507200 |
| C  | 5.85457000  | 0.42551200  | -0.06279500 |
| F  | 6.62115500  | 0.00966100  | 0.95357200  |
| F  | 6.45020700  | 0.09221000  | -1.21550100 |
| F  | 5.77361700  | 1.77397600  | -0.00515500 |
| C  | 1.31958800  | 3.01543300  | 0.06427200  |
| C  | 2.69120000  | 2.90128200  | -0.07026100 |
| H  | 0.78160100  | 3.78222000  | -0.49172400 |

|   |            |            |             |
|---|------------|------------|-------------|
| H | 0.84561000 | 2.67956300 | 0.98480400  |
| H | 3.21511200 | 2.24282100 | 0.62051100  |
| C | 3.49069900 | 3.50683400 | -1.15189800 |
| H | 4.29401300 | 4.10268500 | -0.69544000 |
| H | 3.99294700 | 2.70126900 | -1.70034800 |
| H | 2.90107500 | 4.13350300 | -1.82505600 |

**Propene** optimized by B3LYP-D3 functional

E (B3LYP-D3-CPCM/BS1) = -117.908550au

H(B3LYP-D3-CPCM/BS1) = -117.823507au

G(B3LYP-D3-CPCM/BS1) = -117.853514au

E(B3LYP-D3-CPCM/BS2//B3LYP-D3/BS1) = -117.960991au

|   |             |             |             |
|---|-------------|-------------|-------------|
| C | -1.28373800 | 0.22058400  | 0.00000900  |
| C | -0.13367800 | -0.45627700 | 0.00003100  |
| H | -1.30468800 | 1.30921300  | -0.00005800 |
| H | -2.24652800 | -0.28428300 | 0.00000700  |
| H | -0.16262200 | -1.54716300 | 0.00006700  |
| C | 1.23531900  | 0.16361500  | -0.00002700 |
| H | 1.81179400  | -0.15137200 | 0.88045800  |
| H | 1.81199800  | -0.15188500 | -0.88019900 |
| H | 1.18262900  | 1.25795900  | -0.00034900 |

(HOAc)<sub>2</sub> optimized by B3LYP-D3 functional

E (B3LYP-D3-CPCM/BS1) = -458.201157au

H(B3LYP-D3-CPCM/BS1) = -458.064049au

G(B3LYP-D3-CPCM/BS1) = -458.111872au

E(B3LYP-D3-CPCM/BS2//B3LYP-D3/BS1) = -458.417935au

|   |             |             |             |
|---|-------------|-------------|-------------|
| O | -1.25703500 | 1.08898300  | 0.00004400  |
| O | -1.42125000 | -1.16195200 | 0.00002100  |
| C | 1.93177300  | -0.05864500 | -0.00002000 |
| O | 1.42125300  | 1.16194600  | 0.00006600  |
| O | 1.25705100  | -1.08900200 | -0.00002300 |
| C | 3.43786800  | -0.06842700 | -0.00004700 |
| H | 3.80462900  | -1.09498600 | -0.00025500 |
| H | 3.80835700  | 0.46379700  | -0.88222500 |
| H | 3.80837200  | 0.46342400  | 0.88235400  |
| H | 0.41743400  | 1.11733900  | 0.00011900  |
| H | -0.41742000 | -1.11741500 | 0.00008500  |
| C | -1.93177900 | 0.05864200  | -0.00000500 |
| C | -3.43788100 | 0.06845900  | -0.00005100 |
| H | -3.80464000 | 1.09501900  | -0.00002800 |
| H | -3.80835400 | -0.46354200 | -0.88237200 |
| H | -3.80841800 | -0.46360700 | 0.88220400  |

**TS<sub>5,7</sub>**

E (B3LYP-D3-CPCM/BS1) = -2501.075808 au

H(B3LYP-D3-CPCM/BS1) = -2500.642757 au

G(B3LYP-D3-CPCM/BS1) = -2500.758703 au

E(B3LYP-D3-CPCM/BS2//B3LYP-D3/BS1) = -2502.46837 au

|    |             |             |             |
|----|-------------|-------------|-------------|
| Au | -3.32432700 | -0.50406600 | 0.03296000  |
| P  | -3.80161700 | 1.42081000  | 1.15522500  |
| C  | -5.50930100 | 1.42439800  | 1.83710200  |
| H  | -5.63209200 | 0.58121900  | 2.52280300  |
| H  | -5.70224100 | 2.35943200  | 2.37386900  |
| H  | -6.23110300 | 1.31977800  | 1.02201800  |
| C  | -3.69004900 | 2.92946800  | 0.12049700  |
| H  | -3.97599600 | 3.80549200  | 0.71333200  |
| H  | -2.66601000 | 3.05866300  | -0.24450400 |
| H  | -4.36699100 | 2.83506400  | -0.73356800 |
| C  | -2.69724300 | 1.71304900  | 2.58741700  |
| H  | -1.67238100 | 1.78812700  | 2.21286700  |
| H  | -2.98002400 | 2.64054200  | 3.09707500  |
| H  | -2.77145400 | 0.87485800  | 3.28615600  |
| O  | -2.95765700 | -2.25818200 | -1.11763100 |
| C  | -1.86600000 | -2.88812900 | -0.94653800 |
| C  | -1.46698400 | -3.86750000 | -2.03004800 |
| H  | -0.49830600 | -3.58197500 | -2.45552200 |
| H  | -1.35801600 | -4.86962400 | -1.60335100 |
| O  | -1.14538600 | -2.72507600 | 0.09059000  |
| H  | -2.21266800 | -3.88572000 | -2.82527600 |
| Au | 2.88071000  | -0.68832000 | 0.65890400  |
| P  | 4.76622400  | 0.63985100  | 0.19056100  |
| C  | 6.42774600  | -0.07770300 | 0.53319600  |
| H  | 6.56371400  | -0.98945300 | -0.05605000 |
| H  | 7.21868000  | 0.63638900  | 0.27933700  |
| H  | 6.50396800  | -0.33578900 | 1.59366300  |
| C  | 4.72584800  | 2.22231900  | 1.12450200  |
| H  | 5.58058800  | 2.85387600  | 0.85837900  |
| H  | 3.79288900  | 2.73349600  | 0.87042900  |
| H  | 4.74403100  | 2.02089000  | 2.19964800  |
| C  | 4.82462200  | 1.16320600  | -1.57094100 |
| H  | 3.88685700  | 1.67867100  | -1.79647200 |
| H  | 5.66968200  | 1.83745200  | -1.74873900 |
| H  | 4.91724600  | 0.28622400  | -2.21811700 |
| O  | -0.43172100 | 3.61786700  | -0.92250300 |
| S  | 0.37746000  | 2.42243300  | -0.59864100 |
| O  | 1.84788400  | 2.61672400  | -0.63046500 |
| O  | -0.12441700 | 1.62586600  | 0.55134400  |
| C  | 0.07255900  | 1.30073400  | -2.05133400 |
| F  | 0.72753600  | 0.12726400  | -1.91461000 |
| F  | -1.23957700 | 1.02203000  | -2.17719100 |
| F  | 0.48781000  | 1.86962300  | -3.19208200 |
| C  | 0.97757800  | -1.58363400 | 1.07943800  |
| H  | 0.94246700  | -1.97329200 | 2.10016200  |
| H  | 0.37209300  | -0.68159400 | 0.95734600  |
| C  | 0.74149000  | -2.57305000 | 0.06699200  |
| H  | 0.74578800  | -2.21301100 | -0.95748900 |
| C  | 1.19232500  | -3.99420200 | 0.26728500  |
| H  | 0.76765400  | -4.67199300 | -0.47553500 |

|   |            |             |            |
|---|------------|-------------|------------|
| H | 2.28416300 | -4.03370300 | 0.17184000 |
| H | 0.92766900 | -4.34598000 | 1.26879800 |

PMe<sub>3</sub>AuOH

E (B3LYP-D3-CPCM/BS1) = -672.4313894 au

H(B3LYP-D3-CPCM/BS1) = -672.292597 au

G(B3LYP-D3-CPCM/BS1) = -672.340659 au

E(B3LYP-D3-CPCM/BS2//B3LYP-D3/BS1) = -672.905225 au

|    |             |             |             |
|----|-------------|-------------|-------------|
| Au | -0.76512600 | 0.00093900  | -0.00041700 |
| P  | 1.52296100  | 0.00113800  | -0.00008400 |
| C  | 2.27819600  | -0.88822200 | -1.42353700 |
| H  | 1.95799100  | -0.41487400 | -2.35625300 |
| H  | 3.37168600  | -0.87043000 | -1.36293200 |
| H  | 1.93240300  | -1.92604000 | -1.42807900 |
| C  | 2.27687500  | -0.78848900 | 1.48178700  |
| H  | 3.37045800  | -0.76637500 | 1.42457900  |
| H  | 1.94917100  | -0.25760100 | 2.38026700  |
| H  | 1.93815200  | -1.82619900 | 1.55277100  |
| C  | 2.28073700  | 1.67658700  | -0.05639800 |
| H  | 1.94846200  | 2.25603700  | 0.80984300  |
| H  | 3.37400700  | 1.61040700  | -0.05067300 |
| H  | 1.95363200  | 2.19279600  | -0.96354400 |
| O  | -2.76475000 | -0.11136400 | 0.00397500  |
| H  | -3.09226200 | 0.80270500  | -0.01465300 |

PMe<sub>3</sub>AuOAc...H<sub>2</sub>O

E (B3LYP-D3-CPCM/BS1) = -901.5457765 au

H(B3LYP-D3-CPCM/BS1) = -901.336277 au

G(B3LYP-D3-CPCM/BS1) = -901.401305 au

E(B3LYP-D3-CPCM/BS2//B3LYP-D3/BS1) = -902.1365738 au

|    |             |             |             |
|----|-------------|-------------|-------------|
| Au | 0.11173800  | -0.46999500 | 0.04545600  |
| P  | -2.10847300 | 0.03484700  | -0.06040400 |
| C  | -3.26090900 | -1.37336200 | -0.32198300 |
| H  | -3.15333800 | -2.09148400 | 0.49601000  |
| H  | -4.29787300 | -1.02330100 | -0.36313600 |
| H  | -3.01185100 | -1.87650300 | -1.26072000 |
| C  | -2.45960500 | 1.23030700  | -1.40662900 |
| H  | -3.51205900 | 1.53349100  | -1.39404100 |
| H  | -1.81344800 | 2.09887300  | -1.24978100 |
| H  | -2.22229800 | 0.77852800  | -2.37398400 |
| C  | -2.69722500 | 0.87370800  | 1.46358100  |
| H  | -2.07903600 | 1.76226300  | 1.61680400  |
| H  | -3.74728900 | 1.16885000  | 1.36545500  |
| H  | -2.58398600 | 0.20849800  | 2.32413500  |
| O  | 2.59545000  | 1.32048600  | -0.30708300 |
| C  | 2.94884400  | 0.15335800  | -0.08089400 |
| O  | 0.21964800  | 2.76778600  | 0.13820100  |
| O  | 2.15642800  | -0.85216700 | 0.15118100  |
| C  | 4.42538200  | -0.21679900 | -0.06712500 |



|   |            |             |             |
|---|------------|-------------|-------------|
| H | 4.63456300 | -0.92091000 | -0.88018300 |
| H | 5.04484600 | 0.67339800  | -0.18977600 |
| H | 4.67897000 | -0.72077900 | 0.87106000  |
| H | 0.99930500 | 2.22166700  | -0.11626500 |
| H | 0.35214500 | 2.90215900  | 1.08938000  |
